# Supplementary material for: Transcription activator-like effectors from endosymbiotic bacteria control the reproduction of their fungal host
Source: PubMed Central journal article supplement (PMC10746252; doi:10.1128/mbio.01824-23), 2023-11-16
Supplement: mbio.01824-23-s0001.pdf [file mbio.01824-23-s0001.pdf]

1 Supplementary file 1 for

2  
3 **Transcription activator-like effectors from endosymbiotic bacteria control the**  
4 **reproduction of their fungal host**

5  
6 Ingrid Richter<sup>a</sup>, Zerrin Uzum<sup>a</sup>, Philipp Wein<sup>a</sup>, Evelyn M. Molloy<sup>a</sup>, Nadine Moebius<sup>a</sup>, Timothy P. Stinear<sup>b</sup>, Sacha J. Pidot<sup>b</sup>,  
7 Christian Hertweck<sup>a,c,\*</sup>

8  
9 \* Address correspondence to Christian Hertweck. [christian.hertweck@leibniz-hki.de](mailto:christian.hertweck@leibniz-hki.de)

10  
11  
12 **This PDF file includes:**

13  
14       Figures S1 to S3  
15       Tables S1 to S7  
16       SI References  
17  
18  
19  
20  
21

10 20 30 40 50 60 70 80 90 100  
 M. rhizoxinica M1 (CBW77121) MCTASPAVEHAGPKSNSKALGSAARKPAATSRHTAPLDELRSKLGVHLRKGQPPASIGSTMPGRAVGSTMPARAI GVTPADRDTPGYSIDTVGVLGVDE  
 Mycetohabitans sp. M2 (MN840555) MCTASPAVEHAGPKSNSKALGSAARKPAATSRHTAPLDELRSKLGVHLRKGQPPASVSGSTMPGRAVGSTMPARAI GVTPADRDTPGYSIDTVGVLGVDE  
 Mycetohabitans sp. M3 (MN840550) VYTASPAVEHASPKNRKKSLGSTAPKPAATSRRTAALHELRSKIGAPLRGKQPRPSAGAAIP-----ARAI GVTPADYDTPGYSIDTVGVLGVDE  
 Mycetohabitans sp. M4 (MN840552) VYTASPAVEHAGPKSNRKKSLGSTAPKPAATSRRTAALHELRSKIGAPLRGKQPRPSVGAaip-----ARAI GVTPADYDTPGYSIDTIGVLGVDE  
 M. endofungorum M5 (MN840553) VYTASPAGEHAGPKSNHKKSLGTAPKPAATSRRTAALHELRSKIGAPLRGKQPRPSVGAaip-----ARAI GVTPADYDTPGYSIDTVGVLGVDE  
 Mycetohabitans sp. M6 (MN840556) MCTASPAVEHAGPKSNSKALGSAARKPAATSRHTAPLDELRSKLGVHLRKGQPPASIGSTMPGRAVGSTMPARAI GVTPADRDTPGYSIDTVGVLGVDE  
 Mycetohabitans sp. M7 (MN840551) VYTASPAVEHAGPKSNRKKSLGSTAPKPAATSRRTAALHELRSKIGAPLRGKQPRSSVGAaip-----ARAI GVTPADYDTPGYSIDTIGVLGVDE  
 Mycetohabitans sp. M8 (MN840554) MCTASPAVEHAGPKSNSKALGSAARKPAATSRHTAPLDELRSKIGIRLRGKQPPASVRSAMP-----ARAI GVTPTDHDTPGYNIDTVGVLGVDE  
 B. pseudomallei (ZP04890375) ETRHLAVSLFTGEEGREALS GWIADDFDPGGAARLQRMHQLMYAAAVLVKQNGRAAARLLRNYCG-----MSTERPDLQLKRQSYSMQRVLVSAR  
 B. pseudomallei (ZP02502372) ETRHLAVSLFTGEEGREALS GWIADDFDPGGAARLQRMHQLMYAAAVLVKQNGRAAARLLRNYCG-----MSTERPDLQLKRQSYSMQRVLVSAR  
 B. pseudomallei (ZP02494128) EARHLAVSLFTGEEGREALS GWIADDFDPGGAARLQRMHQLMYAAAVLVKQNGRAAARLLRNYCG-----MSTERPDLQLKRQSYSMQRVLVSAR  
 X. euvesicatoria (WP011347306) LAEANA EIDLRSAYA QARDALQS DQASSSASAPARTLASH LAEEQRQEMQVLR TQLVRDEQMLSLQRVHAERCQRNARRLQERLAQVEAKLQQAQHS  
 X. campestris (AZR30894) LARTNAQIEQLQSAYA QARDALQS DQASSSASAPARTLASH LAEEQRQEMQVLR TQLVRDEQMLSLQRVHAERCQRNARRLQERLAQVEAKLQQAQHS  
 X. vasicola (AVQ09097) LARTNAQIEQLQSAYA QARDALQS DQASSSASAPARTLASH LAEEQRQEMQVLR TQLVRDEQMLSLQRVHAERCQRNARRLQERLAQVEAKLQQAQHS  
 X. citri (ARR12757) LADANA EIDLRSAYA QARDALQS DQASSSASAPARTLASH LAEEQRQEMQVLR TQLVRDEQMLSLQRVHAERCQRNARRLQERLAQVEAKLQQAQHS  
 X. campestris (AKS22319) LADTNA EIDLRSAYA QARDALQS DQASSSASAPARTLASH LAEEQRQEMQVLR TQLVRDEQMLSLQRVHAERCQRNARRLQERLAQVEAKLQQAQHS  
 X. oryzae (AKO19890) LARTNAQIEQLQSAYA QARDALQS DQASSSASAPARTLASH LAEEQRQEMQVLR TQLVRDEQMLSLQRVHAERCQRNARRLQERLAQVEAKLQQAQHS  
 X. oryzae (ACD59124) LARTNAQIEQLQSAYA QARDALQS DQASSSASAPARTLASH LAEEQRQEMQVLR TQLVRDEQMLSLQRVHAERCQRNARRLQERLAQVEAKLQQAQHS  
 Burkholderia sp. (WP013592484) -----GAKLAHASIERTAAFIAEGSAAARGLPMPKFMNPRAI RDTLRLLRNREANAAAAREWGTLDHDFMQPVI AVNRLFPIPADASREAADARQAAI  
 Burkholderia sp. (ADN59567) EIAIGAHGAKLADASIARTTASLAAGDATRGALPVPKFMNPRAI RDTLRLLRNREANATAREWADTLDEHFMQPVI AVNRLFPPVPANASREVADARQAAI  
 R. solanacearum (YP003748288) MSATKP-RPEVLQSRPVPAGTRPEDLP GVPDLKAPQTAARQRKIDATAKA AAFNPPTSIAESMRGHLGLGR TKVAPQSVSIAEAMSS EAGLQVHLARLIGQ  
 R. solanacearum (BAH04968) ASKHSGRPVNTVADYSPPARTVSAPPDLPTTADDRDRASRLARTAGLVQRAQRGLQKLGQTRHARAPKPEASSTRLPVTVPDSAPRYRQLLAQGF AATQD  
 R. solanacearum (BAD42384) ASKHSGRPVNTVADYSPPARTVSAPPDLPTTADDRDRASRLARTAGLVQRAQRGLQKLGQTRHARAPKPEASSTRLPVTVPDSAPRYRQLLAQGF AATQD  
 R. solanacearum (YP003747289) AAINVTSVPGFTKTTIDPLP--IPKRPPPPSLGKTTPRPAQGHKLD AIDRQV DNLTAKLYPPLPTGTRADPEAKRAI GSERAFASAVEALFVPSGASVEAK  
 R. solanacearum (WP013209172) AAISVAVP GFTKTTIDPLP--VPKRPPPPKLGKVPKPAQGHKLDGIDRQV HNLTEKLYPPLPAGLHSEPDAKRSIAHEWAFAGAVEALFVPSGASAEAA  
 R. solanacearum (WP011002069) IIFPFYSKTGTTPTRAQPKPDVVPA LKPAAPRRMPPAAPGRKHQRNVDAVVP PAMATSPRAEIRFPLTAD AQRYLRAQWRQAE TGGRFDQAAVDR LTTT  
 R. solanacearum (WP003275417) MATTGPERAKARPSYPI PAR---ADMPPAPPTGPAHTPARQRKIDAAVRATFNPGPSIAELLRHPLGR---KPA AAPVPITEAMGTAEGM QARLGLFGS  
 R. solanacearum (WP003274509) AAINVTSVPGFTKTTIDPLP--IPKRPPPPSLGKTTPRPAQGHKLD AIDRQV DNLTAKLYPPLPTGTRADPEAKRAI GSERAFASAVEALFVPSGASVEAK  
 R. solanacearum (EAP71656) MSATRP-RPEVLQSRPVPAGTRPEDLP GVPDLKAPQTAARQRKIDATAKA AAFNPPTSIAESMRGHLGLGR TKVTPQSVSIAEAMGSEAGLQVHLARLIGQ  
 R. solanacearum (EAP71039) MATTGPERAKARPSYPI PAR---ADMPPAPPTGPAHTPARQRKIDAAVRATFNPGPSIAELLRHPLGR---KPA AAPVPITEAMGTAEGM QARLGLFGS  
 R. solanacearum (CBJ39728) AAINVAVP GFTKTTIDPLP--IPKRPPPPNLSKTPKPAQGHKLD R IDRQV DNLTAKLYPPLPSGQHGDPEAKRAI ASGRAFASAVEALFVPSGAGVANAV  
 R. solanacearum (CBJ35355) MSATKP-RPEVLQSRPVPAGTRPEDLP SVPATGPAQPAARQRKIDATVKATFNPPSSIAESMRSHLGLGQA KVT-QAVSISEAMSSQAGLQVHLARLLGQ  
 R. solanacearum (CAD17997) -----NALKAYPPPALSEASALQPATAREQARAARSQAATAALVQRTQQGLQRMGR TDNSHAAA SAEPGARQPVTVPE SARQYRQLLAQQFAATR D  
 R. solanacearum (BAH47286) IIFPFYSKTGTTPTRAQPKPDVVPA LKPAAPRRMPPAAPGRKHQRNVDAVVP PAMATSPRAEIRFPLTAD AQRYLRAQWRQAE TGGRFDQAAVDR LTTT  
 R. solanacearum (BAH47283) AAINVAVP GFTKTTIDPLP--IPKRQPPNLPKAPKPAQGHKLD R IDRQV HNLTKLYPPLPSGLHADPEAKRAI ASSRA FVS AVEALFVPSGAGVYAV  
 R. solanacearum (BAH04967) -----NALKAYTPPALSEASALQPATAREQARAARSQAATAALVQRTQQGLQRMGR TDNSHAAA SAEPGARQPVTVPE SARQYRQLLAQQFASTR D  
 R. solanacearum (BAD42389) MSATRP-RPEVLQSRPVPAGTRPEDLP SVPATGPAQPAARQRKIDATVKA AAFNPSSSIAESMRSHLGLGQDKVARQSVSIAEAMSS EAGMRVHLARLLS Q

```

      110      120      130      140      150      160      170      180      190      200
M. rhizoxinica M1 (CBW77121) PRHWTRAQLLNHLVEANYPGPTLATAELAYQLHTSLDDGTGEVNAARVQLVLFAMHEAGLRDNTRAMMD-----
Mycetohabitans sp. M2 (MN840555) PRHWTRAQLLNHLVEANYPGPTLATAELAYQLHTSLDDGTGEVNAARVQLVLFAMHEAGLRDNTRAMMD-----
Mycetohabitans sp. M3 (MN840550) PRLWTRAQLLNHLVEANYPGPNLATAELAHQLHTGLDDGTGKVSAAARQLVLFAMHEAGLRD-----
Mycetohabitans sp. M4 (MN840552) PRLWTRAQLLNHLVEANYPGPNLATAELAHQLHTGLDDGTGKVSAAARQLVLFAMHEAGLRD-----
M. endofungorum M5 (MN840553) PRLWTRAQLLNHLVEANYPGPNLATAELAHQLHTGLDDGTGKVSAAARQLVLFAMHEAGLRD-----
Mycetohabitans sp. M6 (MN840556) PRHWTRAQLLNHLVEANYPGPTLATAELAYQLHTSLDDGTGEVNAARVQLVLFAMHEAGLRDNTRAMMD-----
Mycetohabitans sp. M7 (MN840551) PRLWTRAQLLNHLVEANYPGPNLATAELAHQLHTGLDDGTGKVSAAARQLVLFAMHEAGLRD-----
Mycetohabitans sp. M8 (MN840554) PRYWTRAQLLNHLVEANYPGPNLVTAELAHQLHTGLDDGTGKVSAAARQLVLFAMHDAQVDR-----
B. pseudomallei (ZP04890375) GTSLDILGIPPSITGREHHAEQKSVYRNALAIQYLHEKLDAAAYKPDSEDMMLAAQIVSAEALGGSGDRTEREYHFSSR-----
B. pseudomallei (ZP02502372) GTSLDILGIPPSITGREHHAEQKSVYRNALAIQYLHEKLDAAAYKPDSEDMMLAAQIVSAEALGGSGDRTEREYHFSSR-----
B. pseudomallei (ZP02494128) GTSLDILGIPPSITGREHHAEQKSVYRNALAIQYLHEKLDAAAYKPDSEDMMLAAQIVSAEALGGSGDRTEREYHFSSR-----
X. euvesicatoria (WP011347306) RINTEEVWQHEQTVSALEAANGDMQRAVETAAQPPANEARRAPDSDVADAMAALLDALPGFR-----EDTIGPMSR
X. campestris (AZR30894) RVNTEKELWQHEQTVSALEAANGDMQRAVETAAQPPANEARRAPDSDVADAMAALLDALPGFR-----EDTIGPMSR
X. vasicola (AVQ09097) RVNTEKELWQHEQTVSALEAANGDMQRAVETAAQPPANEARRAPDSDVADAMAALLDALPGFR-----EDTIGPMSR
X. citri (ARR12757) RINTEELWQYEQTVSALEAANGDMQRVVEHAAAHPPADEALFVAADIVADTMEALLEALPGFR-----EQTIDPVNR
X. campestris (AKS22319) RINTEELWQHEQTVSVLEAADGDMQRAVEHAAQLPADEARFVASDIVADTMQTLLDVLPGFR-----EETLDPVSR
X. oryzae (AKO19890) RVNTEELWQDHTVSALEAANGDMQRAVETAAQSPADEARRAPDSDVADAMAALLDALPGFR-----EDTIGPMSR
X. oryzae (ACD59124) RVNTEKELWQDHTVSALEAANGDMQRAVETAAQSPADEARRAPDSDVADAMAALLDALPGFR-----EDTIGPMSR
Burkholderia sp. (WP013592484) NRLLDGLTLRRPRPARADASLPPAVERLPQACVVPVLAQALAEASDGDPILAARILDRLQQPF-----DIAG-----
Burkholderia sp. (ADN59567) DSLLDGLTLRRPRPAQADPTLPLTVDRLPQECVVPVADALAEASGGDPALAARILHRLQQLPL-----DIGGLSGVSAIGDTSSTRDTAGTAENSGISG
R. solanacearum (YP003748288) LVHAPAVHTLHQALLGGLPQGAESASTHPLAQHVLVAEALANACGGDAVRATAALEALKAGT-----FLPTSHAEGE
R. solanacearum (BAH04968) AGAVGRLADRLRALAPPLAEAG--ERTRYARPMLLAKVLEHTCGQDAAAALRVLDRLTGGM-----RLGAPTFAAPDG
R. solanacearum (BAD42384) AGAVGRLADRLRALAPPLAEAG--ERTRYARPMLLAKVLEHTCGQDAAAALRVLDRLTGGM-----RLGAPTFAAPDG
R. solanacearum (YP003747289) AETAPHLHNLRLDLTRIAEQPDAVDSTRYAGMLQCARALAAATGGNAADACAALHLRTHF-----SLTDGSDNAP
R. solanacearum (WP013209172) SR----LPDLLGHLKQVADAQPGVADATRYAGMLQCARALATATGGNAADACVALEHLRTHF-----SLTDGSGGAP
R. solanacearum (WP011002069) LT----ARLLATSAAATGNGVHEDSGEKACARAIMVCDALAQATGGDPARAHDALLALLDIT-----SHADAR
R. solanacearum (WP003275417) RAGAPGMQALHTALLGTFAARLVASASARPFARHVLLAEALANASEGDAVRAMAALRVLQSGR-----FLPMLFPENQ
R. solanacearum (WP003274509) AETARHLHNLRLDLTQIAETQPDAAADSTRYAGMLQCARALVAATGGNAADACAALGHLRTHF-----SLTDGSDSES
R. solanacearum (EAP71656) PAHAPAVRTLHRALLDRLPRVAESASAPFAHQHVLVTEALANACGGDAVRATAALRALKAGA-----FLPTLHAEGE
R. solanacearum (EAP71039) RAGAPGMQALHTALLGTFAARLVASASARPFARHVLLAEALANASEGDAVRAMAALRVLQSGR-----FLPMSFPENQ
R. solanacearum (CBJ39728) PG----LRNLIHGLARMAAQPDVDTTRYAGMLQCARALATATGGRADEACRAFEHLREHF-----SLTDGSDGAA
R. solanacearum (CBJ35355) FVHAPTVPRAFHDALLDSLQPTTESASERPFQHVLLAEALANACGGDTRVATAALHALKAGE-----FLPTSHAADE
R. solanacearum (CAD17997) TGAVARLSARLEALAPP-ADAVG--EHLRYARPTLVAEALAHTCGHDAAAAALRVLASLENEA-----RLDTAAFGTTPDAPARA
R. solanacearum (BAH47286) LT----ARLLATSAAATGNGVHEDSGEKACARAIMVSDALAQATGGDPARAHDALLALLDIT-----SHADAR
R. solanacearum (BAH47283) PG----LQTLIDGLAGMAEQPDVDTTRYAGMLQCARALATATGGRADEACRALEHLRDRF-----SLTDGSDGAP
R. solanacearum (BAH04967) TGAVTRLSARLEALAPP-ADAVG--EHLRYARPTLVAEALAHTCGHDAAAAALRVLASLENEA-----RLDTAAFGTTPDAPARS
R. solanacearum (BAD42389) PLHAPAVRALHGALLDSLQPTTESASGRGFAHQHVLVAEALVNACGGDITIRATAALRALKAGE-----FLPTAHGTGD

```

```

                210      220      230      240      250      260      270      280      290      300
                |.....|.....|.....|.....|.....|.....|.....|.....|.....|.....|
M. rhizoxinica M1 (CBW77121) -----STMATMVLQQLRLLNFDQPFHDAPTPTGDARLPDQQLQAWRASWETARVLRTEEGFETLLKLR-----
Mycetohabitans sp. M2 (MN840555) -----STMATMVLQQLRVLNFDQPFHDAPTPGDAHLDPDQQLQAWRASWETARVLRTEEGFETLLKLR-----
Mycetohabitans sp. M3 (MN840550) -----STTATMMLRQLRRLNFDQPFHDASAAAGGAHLDPDQR-QAWRASWETARVLRTEYGFETLLKLR-----
Mycetohabitans sp. M4 (MN840552) -----STTATMVLRLRRLNFDQPFHDASAAVGGGAHLDPDQR-QAWRASWETARVLRTEYGFETLLKLR-----
M. endofungorum M5 (MN840553) -----STTATMVLRLRRLNFDQPFHDASAAAGGAHLDPDQR-QAWRASWETARVLRTEYGFETLLKLR-----
Mycetohabitans sp. M6 (MN840556) -----STMATMVLQQLRLLNFDQPFHDAPTPTGDARLPDQQLQAWRASWETARVLRTEEGFETLLKLR-----
Mycetohabitans sp. M7 (MN840551) -----STTATMMLRQLRRLNFDQPFHDASAVAGGAHLDPDQR-QAWRASWETARVLRTEYGFETLLKLR-----
Mycetohabitans sp. M8 (MN840554) -----STTATKVLRLRRLNFDQPFHDVSAAGGAHLDPDQR-QAWRASWETARVLRTEYGFETLLKLR-----
B. pseudomallei (ZP04890375) -----VVDNLGSIYQERLSIDALACAANLISIDRDNGAKALGAVAMLSSEQADVMDALEQAGELVRLPLGIRRDIA
B. pseudomallei (ZP02502372) -----VVDNLGSIYQERLSIDALACAANLISIDRDNGAKALGAVAMLSSEQADVMDALEQAGELVRLPLGIRRDIA
B. pseudomallei (ZP02494128) -----VVDNLGSIYQERLSIDALACAANLISIDRDNGAKALGAVAMLSSEQADVMDALEQAGELVRLPLGIRRDIA
X. euvesicatoria (WP011347306) -----QVLRRAWADGLHGRSAAFGGTDALQPVDAALNIALQALSIASEGDAEAAANVLRQLGEVQLRELI PPPQVSNAAEAVP
X. campestris (AZR30894) -----QILRTWAGGLQGRSAAFGGTDALQPVDAALNIALQALSIASEGDATAANVLRQLGEVQLRELI PPPQVSNAAEAVP
X. vasicola (AVQ09097) -----QILRTWAGGLQGRSAAFGGTDALQPVDAALNIALQALSIASEGDATAANVLRQLGEVQLRELI PPPQVSNAAEAVP
X. citri (ARR12757) -----QVLRRAWADGLHGRSAAFGGTDALQPVDAALNIALQALSIASEGDATAANVLRQLGEVQLRELI PPPQVSNAAEAVP
X. campestris (AKS22319) -----QVLRVWADGLHARSAAFGGTEALQPVDAALNIALQALSIASEGDATAANVLRQLGEVQLRELI PPPQVSNAAEAVP
X. oryzae (AKO19890) -----QVLRVWADGLHARSAAFGGTEALQPVDAALNIALQALSIASEGDATAANVLRQLGEVQLRELI PPPQVSNAAEAVP
X. oryzae (ACD59124) -----QVLRVWADGLHARSAAFGGTEALQPVDAALNIALQALSIASEGDATAANVLRQLGEVQLRELI PPPQVSNAAEAVP
Burkholderia sp. (WP013592484) -----DAAHAAPDELEERRAWRCAQDLAHARCAALEGLLRLQFGDGARHAEERGNGAARLVVYLQAGRKLR-----S
Burkholderia sp. (ADN59567) -----TSDASGTSNTSNTSNTTIRAAPAQHPSQAAPADLEQRAWRCAQNLAHARCAALEGLLRLQYGD SARHAEERGNGAARLVVYLQAAHKLR-----S
R. solanacearum (YP003748288) -----TASFRPGNGGANGSRI GRMAPDGPVRRP GNVGANTLHSAQPAAEDAML DAMHAAQELAGIGDVG MQALLALMPRLKPAKHEP
R. solanacearum (BAH04968) -----SPDAHEP-ALIRQASAASDAFFDALSDFHDAAPAAETGAAWRTAQLLARYHAGFDALCSLMH I PDVPEQRQA
R. solanacearum (BAD42384) -----SPDAHES-ALIRQASAASDAFFDALSDFHDAAPAAETGAAWRTAQLLARYHAGFDALCSLMH I PDVPEQRQA
R. solanacearum (YP003747289) -----PSPEKQAWSAAKLLAHTASGFDALLALR PALAEVDAARPDG-MNHRMKREGLRTFLQAADHLAARMPA-----DT
R. solanacearum (WP013209172) -----ATPAQKHAWSTAKLLAHTASGFDALLALR PALAEVDAARPDG-MNHRMKREGLRTFLQAADHLAARMPA-----DT
R. solanacearum (WP011002069) -----VRADVLALQ TALGMTAIGLDTLLAIAPHVLPQR-----GSAAPEIQREALRHALRAADHL LRRKPADAPGPTS
R. solanacearum (WP003275417) -----PASP-LGAPGSDTGAGALH PAR-----SSFPDDGMGLSPAQTARAKLDALHVGQALASIGDVG MQTLAASIPGLEPARHEP
R. solanacearum (WP003274509) -----PSPEKQAWSAAKLLAHTASGFDALLALR PALAEVDAARPDG-MNDRMKREGLRTFLQAADHLAARMPA-----DT
R. solanacearum (EAP71656) -----TASFRSSNAGADASRIARMA LDGPGVRRRTGSAGADALHSAQPAAEDAML DAMHAAQELAGIGDVG MQALLALMPRLKPARHEP
R. solanacearum (EAP71039) -----PASP-LRAPRFSDTGAGALH PAR-----SSFPDDGMGLSPAQTARAKLDALHVGQALASIGDVG IQTLAASIPGLEPALHEP
R. solanacearum (CBJ39728) -----PTPAQTQAWSTAKLLAHTASGFDALLALR PALAKVDATLPDDHMNGRMKREGLRTFLQAADLMAARLPAGVAPPQT
R. solanacearum (CBJ35355) -----TASFRSHASVRIASAAQVAPNGPDRGIDNADATSPSTRRVLAKDAML DAMHAAQELAGIGDVG MQALLALMPRLPAKREP
R. solanacearum (CAD17997) -----SVSSATFHDAISEQEGPDEPDGPPPPQSFSARSSASSEAFFDAMSVLEEPGEPEDAGAAWRTAQLLSRYHAGFEALCDLMRLPQT PAHRHA
R. solanacearum (BAH47286) -----VQADVLALQ TALGMTAIGLDTLLAIAPHVLPQRGL--AEGSAAPEIQREALRHALRAADHL LRRKPADAPGPTS
R. solanacearum (BAH47283) -----PIPAQMHWSTAKLLAHTASGFDALLALR PALAEVDAARPDG-MNHRMKREGLRTFLQAADLMAARLPAGVAPPQT
R. solanacearum (BAH04967) -----SVSSATFHDAISEQEAPEPDGPPPPQSFSARSSASSEAFFDAMSVLEEPGEPEDAGAAWRTAQLLSRYHAGFEALCDLMRLPQT PAHRHA
R. solanacearum (BAD42389) -----AASFRPSDAGAEADAATAQAEPAQGHARRIGNASANA IHPTRQTPVEHAMLDAMRAAQGLAGIGDVG MQALLAVMPPLOPAKREP

```

|                                         | 310                 | 320                 | 330                    | 340            | 350                | 360                | 370           | 380           | 390  | 400 |
|-----------------------------------------|---------------------|---------------------|------------------------|----------------|--------------------|--------------------|---------------|---------------|------|-----|
| <i>M. rhizoxinica</i> M1 (CBW77121)     | AEKCAPLSRSVDRDMLHVL | LDSDRIDNHVRLTQP     | HDS-----               | HATPVHAAPDFDD  | PSPSGT             | DKRQWLQGH          | LAMKGD        | AKSTLLASQV    | FAIA |     |
| <i>Mycetohabitans</i> sp. M2 (MN840555) | AEKCAPLSRSVDRDMLHVL | LDSDRIDNHVRLTQP     | HDS-----               | HATPVHAAPDFDD  | PSPSGT             | DKRQWLQGH          | LAMKGD        | AKSTLLASQV    | FAIA |     |
| <i>Mycetohabitans</i> sp. M3 (MN840550) | AEKCAPLSRSADRDM     | LHVLDDTAEWIENHVRLAQ | RDG-----               | HATSVHAALDFDD  | PSPSGT             | TAKRQWLQSH         | LAMKGD        | AKATLLASQV    | FAIA |     |
| <i>Mycetohabitans</i> sp. M4 (MN840552) | AEKCAQLSRSANRDM     | LHVLDDTAEWIENHVRLAQ | RDG-----               | HATSVHAALDFDD  | PSPSGT             | TAKRQWLQSH         | LAMKGD        | AKATLLASQV    | FAIA |     |
| <i>M. endofungorum</i> M5 (MN840553)    | AEKSAFLSRADRDM      | LHVLDDTADRIETHVRLVQ | RDG-----               | HATSVHAALDFDD  | PSPSGT             | TAKHQWLQSH         | LAMKGD        | AKATLLASQV    | FAIA |     |
| <i>Mycetohabitans</i> sp. M6 (MN840556) | AEKCAPLSRSVDRDMLHVL | LDSDRIDNHVRLTQP     | HDS-----               | HATPVHAAPDFDD  | PSPSGT             | DKRQWLQGH          | LAMKGD        | AKSTLLASQV    | FAIA |     |
| <i>Mycetohabitans</i> sp. M7 (MN840551) | AEKCAPLSRSADRDM     | LHVLDDTAERIENHVRLAQ | RDG-----               | HATSVHAALDFDD  | PSPSGT             | TAKRQWLQSH         | LAMKGD        | AKATLLASQV    | FAIA |     |
| <i>Mycetohabitans</i> sp. M8 (MN840554) | AEKFAPLSRSADRDM     | LHVLDDTAERIENYVRFVQ | QHDG-----              | HATPMHAALDFDD  | SSPSGT             | TAKRQWLQGH         | LAMKGD        | AKATLLASQV    | FAIA |     |
| <i>B. pseudomallei</i> (ZP04890375)     | TVADLDKVLNANGEGPG   | ARASVSSVDPMGQASAKAI | GKLRALAVAP-DIGNIP      | IGAAARAAIPM    | QOKIAYFKWRNG-LAD   | ERKARLVFERLYKLN    | KYA           |               |      |     |
| <i>B. pseudomallei</i> (ZP02502372)     | TVADLDKVLNANGEGPG   | ARASVSSVDPMGQASAKAI | GKLRALAVAP-DIGNIP      | IGAAARAAIPM    | QOKIAYFKWRNG-LAD   | ERKARLVFERLYKLN    | KYA           |               |      |     |
| <i>B. pseudomallei</i> (ZP02494128)     | TVADLDKVLNANGEGPG   | ARASVSSVDPMGQASAKAI | GKLRALAVAP-DIGNIP      | IGAAARAAIPM    | QOKIAYFKWRNG-LAD   | ERKARLVFERLYKLN    | KYA           |               |      |     |
| <i>X. euvesicatoria</i> (WP011347306)   | PMEIVTACVGLLASVPR   | GMQVLLHTLCEQPTSPARE | WLEAAQVYLRASHRLAL      | TPDAEQAERAWLAD | AQMGARHAVHG        | DSPQLQGSATDA       | QRS           | AFHAFR        |      |     |
| <i>X. campestris</i> (AZR30894)         | PMEAVTTCVGLLASVPR   | GMQVLLHTLCEQPTSPARE | WLEAAQVYLRASHRLAL      | TPDAEQAERAWLAD | AQMGARHAVHG        | DSPQLQGSATDA       | QRS           | AFHAFR        |      |     |
| <i>X. vasicola</i> (AVQ09097)           | PMEAVTTCVGLLASVPR   | GMQVLLHTLCEQPTSPARE | WLEAAQVYLRASHRLAL      | TPDAEQAERAWLAD | AQMGARHAVHG        | DSPQLQGSATDA       | QRS           | AFHAFR        |      |     |
| <i>X. citri</i> (ARR12757)              | TMETVTACVGLLASVPR   | GMQVLLHMLREEP       | TPSREWLEAAQVYLRASHRLAL | TPDAEQAERTWLGD | AQMGARHAVHG        | DSPQLQGSATDA       | QRGAFHAFR     |               |      |     |
| <i>X. campestris</i> (AKS22319)         | PMEETVTACVGLLASVPR  | GMQVLLHMLREEP       | TPSREWLEAAQVYLRASHRLAL | TPDAEQAERTWLGD | AQMGARHAVHG        | DSPQLQGSATDA       | QRGAFHAFR     |               |      |     |
| <i>X. oryzae</i> (AKO19890)             | PMEAVTTCVGLLVSVPR   | GMQVLLHMLREEP       | TPSREWLEAAQVYLRASHRLAL | TPDAEQAERAWLAN | AQMGARHAVHG        | DSPQLQGSATDA       | QRS           | AFHAFR        |      |     |
| <i>X. oryzae</i> (ACD59124)             | PMEAVTTCVGLLVSVPR   | GMQVLLHMLREEP       | TPSREWLEAAQVYLRASHRLAL | TPDAEQAERAWLAD | AQMGARHAVHG        | DSPQLQGSATDA       | QRS           | AFHAFR        |      |     |
| <i>Burkholderia</i> sp. (WP013592484)   | IDADLGATPADLNHE     | STYRFLFADDPYGRHMLAL | DAARRLPP-----          | DAADAHDTG---   | ACEIEAITAYRL       | WLQLG-FDESGPGS     | DLARASQLL     | FDGG          |      |     |
| <i>Burkholderia</i> sp. (ADN59567)      | MDADLGATPADLNDA     | AYRMFIEDPYARHALLAL  | DAARRLPP-----          | DAASVHDTG---   | DCEIEAITAYRL       | WQMG-FDESGPGS      | DLEAAQLL      | FDGG          |      |     |
| <i>R. solanacearum</i> (YP003748288)    | LECVLQAAEQVTTET     | KGAQVRLPDIIGHAEK    | VADTRNDTLACKVLR---     | AQVKALRAPD     | TYDALSRADKSAV      | FAWRQG-FRTDDRHS    | LLSQTQ        | QLAK-F        |      |     |
| <i>R. solanacearum</i> (BAH04968)       | AHAFLOAADALQHG      | SVKPPAGSPQALLDK     | HPIGSGTPEESLAIK-----   | TLHGAAAVLRGE   | APTPEQAGALFA       | WRQG-FREEGPGT      | ALDKTKAR      | IGR--         |      |     |
| <i>R. solanacearum</i> (BAD42384)       | AHAFLOAADALQHG      | SVKPPAGSPQALLDK     | HPIGSGTPEESLAIK-----   | TLHGAAAVLRGE   | APTPEQAGALFA       | WRQG-FREEGPGT      | ALDKTKAR      | IGR--         |      |     |
| <i>R. solanacearum</i> (YP003747289)    | PGALLQRARSHLAS      | ADRHSLAGDGLAVHALL   | CAADLHADPG-----        | KAHAIGDR-----  | TQVAAYVAWRSG-      | YREGGKGSALERS      | LGRMNK-F      |               |      |     |
| <i>R. solanacearum</i> (WP013209172)    | PHAQWQDAHNRLSHA     | ADRSTLGGDGLVNLAL    | CAAKVHAAPH-----        | DAANAIDDR----- | TQVAAYVAWRSG-      | YREGGKGTALERS      | LGRMNK-F      |               |      |     |
| <i>R. solanacearum</i> (WP011002069)    | LEALAAALADPVLPA     | VERGRPGSSAGASVAP    | PKAPAWLADPGNALAI       | KALHAANALRAD   | PAAQCPH            | LAQAYLAWRNG-FD     | REGPGTDL      | AKAQQRLFK-L   |      |     |
| <i>R. solanacearum</i> (WP003275417)    | LEFVLQSAERITQET     | TRGRKVLHGEILAHAD    | AVRGTSANTLACKVLR---    | AEVRLGAEHPVSG  | LDRADKAAVFA        | WRQG-FRSDEKRS      | PLRRTQER      | FAK-F         |      |     |
| <i>R. solanacearum</i> (WP003274509)    | PGALLERARSHLAS      | ADRHSLAGDGLAVHALL   | CAADLHADPS-----        | KAHAIGDR-----  | TQVAAYVAWRSG-      | YREGGKGSALERS      | LGRMNK-F      |               |      |     |
| <i>R. solanacearum</i> (EAP71656)       | LECVLQAAEQITTE      | KGAQVRFDDIIA        | HAEKVAGTRDDTLACKVLR--- | AEVKALRTPGIY   | DALSRADKSAV        | FAWRQG-FRTDDRHS    | LLSQTQ        | QLAK-F        |      |     |
| <i>R. solanacearum</i> (EAP71039)       | LEFVLQSAERITQET     | TRGRKVLHGEILAHAD    | AVRGTSADTLACKVLR---    | AEVRLGAEHPVSG  | LDRADKAAVFA        | WRQG-FRSDEKRS      | PLRRTQER      | FAK-F         |      |     |
| <i>R. solanacearum</i> (CBJ39728)       | PHAQLQDARARLVAA     | TDRASLAGDGLALNAL    | CAAQVHAQPH-----        | EAAQAVKDP----- | AQVAAYVAWRSG-      | YREGGKGSALERS      | VGRMHK-F      |               |      |     |
| <i>R. solanacearum</i> (CBJ35355)       | LEFVLQAAEQVAAE      | TKGAQVRLPDIIE       | HAEKMAGTRGDTLACKVLR--- | AEVKALRAAD     | THDALSRADKSAV      | FAWRQG-FRSDDKHS    | LLSQTQ        | QLAK-F        |      |     |
| <i>R. solanacearum</i> (CAD17997)       | AHAFLOAADALQGA      | AGQAASPOALLQRC      | PPSGT                  | PDDSLAIK-----  | TLHAAAQLRGEAL      | SPEQTGALFAWRQG-FRA | EGPGS         | DLAKVKARTAK-- |      |     |
| <i>R. solanacearum</i> (BAH47286)       | LEALAAALADPVLPA     | VERGRPGSSAGASVAP    | PKAPAWLADPGNALAI       | KALHAANALRAD   | PAAQCPH            | LAQAYLAWRNG-FD     | REGPGTDL      | AKAQQRLFK-L   |      |     |
| <i>R. solanacearum</i> (BAH47283)       | PHAQLQDARARLDA      | ADRASLAGDGLALNAL    | VCAAQVHAEPH-----       | EAAHAVDDR----- | AQVAAYVAWRSG-      | YREGGKGSALERS      | LGRMHK-F      |               |      |     |
| <i>R. solanacearum</i> (BAH04967)       | AHAFLOAADALQGA      | -----SPRALQRC       | PPSGAPDDSLAIK-----     | TLHAAAQLRGEAL  | SPEQTGALFAWRQG-FRA | EGPGS              | DLAKVKARTAK-- |               |      |     |
| <i>R. solanacearum</i> (BAD42389)       | LEFVLQAAEQVSVET     | KGAQVLLPDIIGHAE     | KMAGTRNDTLACKVLR---    | AEVKALRAAD     | TYDALSRADKSAV      | FAWRQG-FLTDDKHS    | LLSQTQ        | QLAK-F        |      |     |

```

          410          420          430          440          450          460          470          480          490          500
M. rhizoxinica M1 (CBW77121)  KKFFDQT-----EPPHSASGPTPEGRFASFIETLTPNEKEALFDWQQR--FHESGRGTDKAKASGRLLNNVRKVVTSIIGKL
Mycetohabitans sp. M2 (MN840555) KKFFDQT-----EPPHSASGPTPEGRFASFIETLTPNEKEALFDWQQR--FHESGRGTDKAKASGRLLNNVRKVVTSIIGKL
Mycetohabitans sp. M3 (MN840550) KKYFDQT-----EHPHSTSGSTPEDRFASFIRTLAPSEKEALFDWQQR--FHESGRGTDKAKASGRLLNNVRKVVTSIIGKV
Mycetohabitans sp. M4 (MN840552) KKYFDQT-----EHPHSTSGSTPEDRFASFIRTLAPSEKEALFDWQQR--FHESGRGTDKAKASGRLLNNVRKVVTSIIGKV
M. endofungorum M5 (MN840553)  KKYFDQT-----EPPHSTSGSTPEDRFASFIRTLAPSEKEALFDWQQR--FHESGRGTDKAKASGRLLNNVRKVVTSIIGKV
Mycetohabitans sp. M6 (MN840556) KKFFDQT-----EPPHSASGPTPEGRFASFIETLTPNEKEALFDWQQR--FHESGRGTDKAKASGRLLNNVRKVVTSIIGKL
Mycetohabitans sp. M7 (MN840551) KKYFDQT-----EHPHSTSGSTPEDRFASFIRTLAPSEKEALFDWQQR--FHESGRGTDKAKASGRLLNNVRKVVTSIIGKV
Mycetohabitans sp. M8 (MN840554) KKYFDQT-----EHPHSTSGSTPEDRFASFIRTLAPSEKEALFDWRQR--FHESGRGTDKAKASGRLLNHFVRKVITSIIGKV
B. pseudomallei (ZP04890375)  DRAIPRG-----KNLTGRLRRI GDDIAGAFGHRKPNVGMLEEGLLGG-----FLREDVFNEKIAPAFHSLIEKYRES
B. pseudomallei (ZP02502372)  DRAIPRG-----KNLTGRLRRI GDDIAGAFGHRKPNVGMLEEGLLGG-----FLREDVFNEKIAPAFHSLIEKYRES
B. pseudomallei (ZP02494128)  DRAIPRG-----KNLTGRLRRI GDDIAGAFGHRKPNVGMLEEGLLGG-----FLREDVFNEKIAPAFHSLIEKYRES
X. euvesicatoria (WP011347306) NGYETTRAG-----SPYARVNAQLQMFQWAVAGSGRRGRRLNPFNALKLG--MKVGASEALPTAVRRANDAFREAAAGHLTSWL
X. campestris (AZR30894)      NGYETTRAG-----SPYARVNASLQMFQWAVAGGETRQKRALNPFNALKLG--MKVGASEALPTAVRRANDAFREAAAGHLTSWL
X. vasicola (AVQ09097)       NGYETTRAG-----SPYARVNASLQMFQWAVAGGETRQKRALNPFNALKLG--MKVGASEALPTAVRRANDAFREAAAGHLTSWL
X. citri (ARR12757)          NGYETTRAG-----SPYARVNAQLQMFQWAVAGSAPRQKRALNPFNALALG--MKVGASEALPTAERRANDAFREAAAGHLTSWL
X. campestris (AKS22319)     NGYETTRTG-----SPYARVNAQLQMFQWAVAGSRRRGNSDLNPFNALALG--MKVGASEALPTAVRRANDAFREAAAGHLTSWL
X. oryzae (AKO19890)         NGYETTRAG-----SPYARVNASLQMFQWAVAGGQTRQKRALNPFNALKLG--MKVGASEALPTAGRRANDAFREAAAGHLNSWL
X. oryzae (ACD59124)         NGYETTRAG-----SPYARVNASLQMFQWAVAGGQTRQKRALNPFNALKLG--MKVGASEALPTAGRRANDAFREAAAGHLNSWL
Burkholderia sp. (WP013592484) TTWVARGAERQARKDRALGPIDGAPPAHRFAHARARIGLAVHDMPRAFQGNRSPIGVSSLLGADTPFFDTTRGRYDTALIAARDALLDYSHAQLPAAATP
Burkholderia sp. (ADN59567)  TTWVARGAERQARKDRALGPIDGAPPAQRFAQARARVGLAVHDPVRAFGRNRPIDTSSLLGADTPFFDTTRGQYDSALIAAREALLDYSNEQLPCAATP
R. solanacearum (YP003748288) RKYVSRAETRDKLDRMRHDP-----SQSTAATVRLVANNVQRAFVSHKKSPLLGMGRYGALG---TGTRHVPTDLELDKHLRTAIDELKGVHAAR
R. solanacearum (BAH04968)   --FVRR-----VIPRVEKHGWRTMLWQMIGKKASPLSSAR-LGLQA---AHRKNLAGEYKDYVDALRSAAATTLAARYAQA
R. solanacearum (BAD42384)   --FVRR-----VIPRVEKHGWRTMLWQMIGKKASPLSSAR-LGLQA---AHRKNLAGEYKDYVDALRSAAVTTLAARYAQA
R. solanacearum (YP003747289) TAWARR-----AEHRANHRLAAFDPRLLGMRKTPVIAAA-YGTGG---ANLGLLNQEAQALHDTVKDGLAEMLAHSVTL
R. solanacearum (WP013209172) TTWARR-----AEHRANHRLAAFDPRLLGMRKSPATAAA-YGTGG---ANLGLLNQEAQALHDTVKDGLAEMLAHSVTL
R. solanacearum (WP011002069) FAYAEER-----AARTG---MAARAAAAGFFGTQKSPLSALQNFGTAG---VMLGHPDDEFARFTAALAP---VKTQLADRL
R. solanacearum (WP003275417) RKYVARAEKRDALNKMHFDPNPI--RSAGKLATKTAGLVTNVQRFVSHQKSPLLGGLKYGALA---AGAQLAPTQVRLDEHLITAMGELKAYLESS
R. solanacearum (WP003274509) TAWARR-----AEHRANHRLAAFDPRLLGMRKTPVIAAA-YGTGG---ANLGLLNQEAQALHDTVKDGLAEMLAHSVTL
R. solanacearum (EAP71656)   RKYVSRAETRDKLDRMRHDP-----SQSTAATARLVANNVQRAFVSHKKSPLLAMGRYGTG---TGTRHVPTDLELDKHLRTAIDALKAHVEAR
R. solanacearum (EAP71039)   RKYVARAEKRDALNKMHFDPNPI--RSAGKLATKTAGLVTNVQRFVSHQKSPLLGGLKYGALA---AGAQLAPTQVRLDEHLITAMGELNAYLKSS
R. solanacearum (CBJ39728)   TTWARR-----AEHRATHPLAAFDPRLGMRKSPATAAA-YGTGG---ANLGLLNQEAQALHDTVKRGIEMQAHSTEL
R. solanacearum (CBJ35355)   RKYVSRAETRDKLDKARHDPGN-----PMQSSVATARLVANNAQRVFSHKKSPLLAMKYGSLA---AGTKHVPMQVLELDKHLRTAIDALRVRLAQA
R. solanacearum (CAD17997)   --FVSR-----TIRRVENHGWRSTLWQVVGKKSPLSAAR-LGMQA---AHRVSLDKKEYTAYAASLRTALGMLGARYREA
R. solanacearum (BAH47286)  FTYAEER-----AARTG---MAARAAAAGFFGTQKSPLSALQNFGTAG---VMLGHPDDEFARFTAALAP---VKTQLADRL
R. solanacearum (BAH47283)  TTWARR-----AEHRATHPLAAFDPRLGMRKSPATAAA-YGTGG---ANLGLLNQEAQALHDTVKHGIEMQAHSTAL
R. solanacearum (BAH04967)  --FVNR-----TIRRVENHGWRSTLWQVVGKKSPLSAAR-LGMQA---AHRVSLAKEYTAYAASLRTALGMLGARYREA
R. solanacearum (BAD42389)  RKYVSRAETRNLNEARQDF-----ARSTAATARLVANNVQRAFVSRKKSPLLAMKYGSLA---AGTRHVPTDQVELDKHMRTAIDALKDRLQTR

```

|                                         | 510     | 520    | 530    | 540     | 550    | 560    | 570     | 580    | 590    | 600      |        |        |        |       |       |        |        |       |       |      |      |       |     |     |     |     |
|-----------------------------------------|---------|--------|--------|---------|--------|--------|---------|--------|--------|----------|--------|--------|--------|-------|-------|--------|--------|-------|-------|------|------|-------|-----|-----|-----|-----|
| <i>M. rhizoxinica</i> M1 (CBW77121)     | VPGEVA  | AAFFNR | RRPGLH | ETDKAK  | ASHRLN | KNFVSE | VATRDRE | HYGSHL | IQRIFG | TMKAP--- | MVAATR | IKSGAG | KATE-  |       |       |        |        |       |       |      |      |       |     |     |     |     |
| <i>Mycetohabitans</i> sp. M2 (MN840555) | VPGEVA  | AAFFNR | RRPGLH | ETDKAK  | ASHRLN | KNFVSE | VATRDRE | HYGSHL | IQRVFG | TMKAP--- | MVAATR | IKSGAG | KATE-  |       |       |        |        |       |       |      |      |       |     |     |     |     |
| <i>Mycetohabitans</i> sp. M3 (MN840550) | VPAKVA  | ALFNQR | PPGLH  | ETDKAK  | ASHRLN | KNFVSE | VALRDRE | HCGSHL | IQRIRG | AMKAP--- | MIAT-  | RIPSGA | SRAAE- |       |       |        |        |       |       |      |      |       |     |     |     |     |
| <i>Mycetohabitans</i> sp. M4 (MN840552) | VPAKVA  | ALFNQR | PPGLH  | ETDKAK  | ASHRLN | KNFVSE | VALRDRE | HCGSHL | IQRIRG | AMKAP--- | MIAT-  | RIPSGA | SRAAE- |       |       |        |        |       |       |      |      |       |     |     |     |     |
| <i>M. endofungorum</i> M5 (MN840553)    | VP GKVA | ALFNQR | PPGLH  | ETDKAK  | ASHRLN | KNFVSE | VAPRDRE | HCGSHL | VQRIRG | AMKAP--- | MIAT-  | RIPSGA | SRAAE- |       |       |        |        |       |       |      |      |       |     |     |     |     |
| <i>Mycetohabitans</i> sp. M6 (MN840556) | VPGEVA  | AAFFNR | RRPGLH | ETDKAK  | ASHRLN | KNFVSE | VATRDRE | HYGSHL | IQRIFG | TMKAP--- | MVAATR | IKSGAG | KATE-  |       |       |        |        |       |       |      |      |       |     |     |     |     |
| <i>Mycetohabitans</i> sp. M7 (MN840551) | VPAKVA  | ALFNQR | PPGLH  | ETDKAK  | ASHRLN | KNFVSE | VALRDRE | HCGSHL | IQRIRG | AMKAP--- | MIAT-  | RIPSGA | SRAAE- |       |       |        |        |       |       |      |      |       |     |     |     |     |
| <i>Mycetohabitans</i> sp. M8 (MN840554) | VPGEVA  | ALFNQR | PDRETD | KAKASH  | RNLKNF | VSEVAL | RDRKH   | CGSHL  | IQRIRG | AMKAP--- | MIAT-  | RIPSGA | SRAAE- |       |       |        |        |       |       |      |      |       |     |     |     |     |
| <i>B. pseudomallei</i> (ZP04890375)     | GAGAG   | GAGAG  | GAGAG  | VAKARSE | VVSRVF | EKLLK  | DGFSSK  | IEIKS  | DDLK   | WVALAVAG | ----   | GRNDA  | VKRSL  | EFES  | SIR-  | RD     | LKN    |       |       |      |      |       |     |     |     |     |
| <i>B. pseudomallei</i> (ZP02502372)     | ----    | GAGAG  | GAGAG  | VAKARSE | VVSRVF | EKLLK  | DGFSSK  | IEIKS  | DDLK   | WVALAVAG | ----   | GRNDA  | VKRSL  | EFES  | SIR-  | RD     | LKN    |       |       |      |      |       |     |     |     |     |
| <i>B. pseudomallei</i> (ZP02494128)     | ----    | GAGAG  | GAGAG  | VAKARSE | VVSRVF | EKLLK  | DGFSSK  | IEIKS  | DDLK   | WVALAVAG | ----   | GRNDA  | VKRSL  | EFES  | SIR-  | RD     | LKN    |       |       |      |      |       |     |     |     |     |
| <i>X. euvesicatoria</i> (WP011347306)   | VARRQ   | IQLAG  | GRMPSQ | DELLAM  | QALLEY | QWLP   | HEQNAT  | DLFT   | TAKVL  | GTERRAQ  | ELQRS  | VAA    | SVNET  | DDLQ  | PAACH | PAIAS- | AWGAL  | RAGRM | LPET  | LR   |      |       |     |     |     |     |
| <i>X. campestris</i> (AZR30894)         | VARRH   | TQSA   | CGQLPS | QDELAM  | QALSEY | YQWLP  | HEQNAT  | DLIFT  | TAKVLA | ETERRAQ  | ELQDS  | VTAS   | SLST   | DDRQ  | PAACH | PAIAS- | AWVAL  | RTGR  | VRLE  | PET  | LR   |       |     |     |     |     |
| <i>X. vasicola</i> (AVQ09097)           | VARRH   | TQSA   | CGQLPS | QDELAM  | QALSEY | YQWLP  | HEQNAT  | DLIFT  | TAKVLA | ETERRAQ  | ELQDS  | VTAS   | SLST   | DDRQ  | PAACH | PAIAS- | AWVAL  | RTGR  | VRLE  | PET  | LR   |       |     |     |     |     |
| <i>X. citri</i> (ARR12757)              | VARRQ   | IQRAG  | GRMPSQ | DELLAM  | QALLEY | QWLP   | HEQNAT  | DLFT   | TAKVL  | GTERRAQ  | ELQRS  | VAA    | SVNE   | ADDLQ | PAACH | PAIAS- | AWAAL  | RAGRM | LPET  | LR   |      |       |     |     |     |     |
| <i>X. campestris</i> (AKS22319)         | VARRQ   | IQLAG  | GRMPSQ | DELLAM  | QALSEY | AHWLP  | HEQNAT  | DLFT   | TAKVL  | GTERRAQ  | ELQRS  | VAA    | SA     | ESD   | DLQ   | PAACH  | PAIAS- | AWVAL | RAGRM | LPET | LR   |       |     |     |     |     |
| <i>X. oryzae</i> (AKO19890)             | VARRH   | IQMT   | CGQLPS | QDELAM  | QALAE  | CVQWLP | HEQSAT  | ELIFT  | TAKVLA | ETERRAQ  | ELQDS  | VTAS   | SLST   | DARQ  | PAACH | PAIAS- | AWVAL  | RTSR  | MRLP  | PET  | MR   |       |     |     |     |     |
| <i>X. oryzae</i> (ACD59124)             | VARRH   | IQMT   | CGQLPS | QDELAM  | QALAE  | CVQWLP | HEQSAT  | ELIFT  | TAKVLA | ETERRAQ  | ELQDS  | VTAS   | SLST   | DARQ  | PAACH | PAIAS- | AWVAL  | RTSR  | MRLP  | PET  | MR   |       |     |     |     |     |
| <i>Burkholderia</i> sp. (WP013592484)   | GRMLT   | HALNA  | ERLQ   | AWSAAR  | PAVPS  | DAPL   | RELQ    | KRRP   | ESFEI  | GRRD     | DARR   | MWDA   | ARAR   | VAA   | LRGQ  | DDER   | MERTV  | GRTL  | RMF   | DD   | ---  | RERRR | RFI | DDM | TEG |     |
| <i>Burkholderia</i> sp. (ADN59567)      | GRMLT   | HALNA  | QRLQ   | AWTDAR  | PDVPA  | HAKPRE | LQKRRP  | ESFAL  | GRRE   | ARRM     | WDAAR  | ARVA   | GLRV   | EGD   | QRTQ  | RNV    | ERAL   | RM    | FDD   | ---  | PQ   | RRR   | FV  | DD  | VTS |     |
| <i>R. solanacearum</i> (YP003748288)    | SGKAQ   | FSIGR  | HGEV   | PVPL    | RAA    | ILEH   | WSAAS   | ADQ-   | RPQGY  | TLDG     | NAV    | VDIA   | EGIR   | ----  | ATGK  | SVV    | GAD    | GR    | LP    | AQ   | ---- | ---   | LE  | Q   | LIG |     |
| <i>R. solanacearum</i> (BAH04968)       | EAAPL   | DPPG   | ALPWR  | SPQEM   | WSSAV  | LKH    | WASALA  | QAS    | PQDC   | VLTND    | ILAA   | IGR    | QLR    | DTV   | TRAF  | DALA   | AGIA   | QATE  | HDD   | G    | LR   | EH    | --- | LR  | AS  |     |
| <i>R. solanacearum</i> (BAD42384)       | EAAPL   | DPPG   | ALPWR  | SPQEM   | WSSAV  | LKH    | WASALA  | QAS    | PQDC   | VLTND    | ILAA   | IGR    | QLR    | DTV   | TRAF  | DALA   | AGIA   | QATE  | HDD   | G    | LR   | EH    | --- | LR  | AS  |     |
| <i>R. solanacearum</i> (YP003747289)    | RRLDG   | GHAL   | PTERR  | GLLLL   | REAV   | LQHW   | RAQIG   | TWR    | SSK    | LKLD     | ADK    | QI     | AR     | AVR   | ----  | SA     | HGT    | D     | DAE   | AV   | LY   | ----  | --- | EF  | R   |     |
| <i>R. solanacearum</i> (WP013209172)    | RQP     | GGH    | SLSTE  | QRGL    | LLL    | REAV   | LQHW    | GAH    | I      | DPT      | WR     | SK     | LK     | LD    | AD    | KR     | DI     | AQ    | AVR   | ---- | ---  | ---   | --- | --- | --- | --- |
| <i>R. solanacearum</i> (WP011002069)    | KAAS    | TSR    | ALK    | TR      | ----   | CA     | VL      | AA     | E      | QW       | ERR    | MA     | SK     | GL    | R     | ST     | F      | R     | S     | R    | D    | L     | E   | V   | A   | A   |
| <i>R. solanacearum</i> (WP003275417)    | DAPAR   | AVQR   | --     | GA      | IP     | LP     | V       | LA     | RA     | AV       | L      | HA     | W      | DA    | S     | E      | T      | R     | ----  | ---  | ---  | ---   | --- | --- | --- | --- |
| <i>R. solanacearum</i> (WP003274509)    | RRLDG   | GHAL   | STERR  | GLLLL   | REAV   | LQHW   | RAQIG   | TWR    | SSK    | LKLD     | ADK    | QI     | AR     | AVR   | ----  | SA     | HGT    | D     | DAE   | AV   | LY   | ----  | --- | --- | --- | --- |
| <i>R. solanacearum</i> (EAP71656)       | SGAAQ   | FNIG   | RHGE   | VPTV    | TL     | RAA    | I       | LE     | H      | WSAAS    | ADR    | RPQGY  | TLDG   | NAV   | VDIA  | EGIR   | ----   | ---   | ---   | ---  | ---  | ---   | --- | --- | --- | --- |
| <i>R. solanacearum</i> (EAP71039)       | DAPAR   | AVQR   | --     | GA      | IP     | LP     | V       | LA     | RA     | AV       | L      | HA     | W      | DA    | S     | E      | T      | R     | ----  | ---  | ---  | ---   | --- | --- | --- | --- |
| <i>R. solanacearum</i> (CBJ39728)       | RGLN    | DR     | HAL    | STE     | QRGL   | LLL    | REAV    | LQHW   | GAS    | I        | GT     | WR     | SS     | K     | L     | S      | D      | H     | K     | R    | A    | I     | D   | R   | V   | R   |
| <i>R. solanacearum</i> (CBJ35355)       | SGEAR   | F      | SV     | GR      | HGE    | VPTV   | IL      | R      | T      | A        | I      | L      | E      | H     | WSAAS | ADK    | RPQGY  | TLDG  | NAV   | V    | H    | I     | A   | E   | C   | I   |
| <i>R. solanacearum</i> (CAD17997)       | LALSP   | -      | A      | H       | A      | D      | L       | P      | W      | K        | Q      | A      | E      | Q     | M     | W      | Q      | A     | I     | L    | Q    | H     | W   | A   | S   | L   |
| <i>R. solanacearum</i> (BAH47286)       | KAAS    | TSR    | ALK    | TR      | ----   | CA     | VL      | AA     | E      | QW       | ERR    | MA     | SK     | GL    | R     | ST     | F      | R     | S     | R    | D    | L     | E   | V   | A   | A   |
| <i>R. solanacearum</i> (BAH47283)       | RALN    | GR     | HAL    | STE     | QRGL   | LL     | REAV    | LQHW   | A      | Q        | S      | I      | G      | T     | WR    | SS     | K      | L     | S     | D    | H    | K     | R   | A   | I   | D   |
| <i>R. solanacearum</i> (BAH04967)       | LALSP   | -      | A      | H       | A      | D      | L       | P      | W      | K        | Q      | A      | E      | Q     | M     | W      | Q      | A     | I     | L    | Q    | H     | W   | A   | S   | L   |
| <i>R. solanacearum</i> (BAD42389)       | SGEAR   | F      | SL     | GR      | Y      | GE     | V       | P      | T      | V        | A      | L      | R      | G     | A     | I      | L      | E     | H     | S    | A    | T     | S   | E   | S   | K   |

|    | 610                                                         | 620                                                                                                  | 630   | 640                                                                  | 650                                        | 660 | 670 | 680 | 690 | 700 |
|----|-------------------------------------------------------------|------------------------------------------------------------------------------------------------------|-------|----------------------------------------------------------------------|--------------------------------------------|-----|-----|-----|-----|-----|
| 1  | ..... ..... ..... ..... ..... ..... ..... ..... ..... ..... |                                                                                                      |       |                                                                      |                                            |     |     |     |     |     |
| 2  |                                                             |                                                                                                      |       |                                                                      |                                            |     |     |     |     |     |
| 3  | <i>M. rhizoxinica</i> M1 (CBW77121)                         | --ESSAADAQASAPD-----                                                                                 | ----- | -----YASAASTAGAAEPTRAASTATQSI--                                      | TTAVADASDRGWDALKRIVPSLRPGMAVEFSDGGALVTTE   |     |     |     |     |     |
| 4  | <i>Mycetohabitans</i> sp. M2 (MN840555)                     | --ESSAADAQASAPD-----                                                                                 | ----- | -----YASAASTAGAAEPTRAASTATQSI--                                      | TTAVADASDSGWDALKRIVPSLRPGMAVEFSDGGALVTTE   |     |     |     |     |     |
| 5  | <i>Mycetohabitans</i> sp. M3 (MN840550)                     | --KSSAADMQASASD-----                                                                                 | ----- | -----HASAASTAEASELTRAASTATQSV--                                      | TTAVADATDSGWDALKHIVPSLRPGMAVEFSDGGELAVTTE  |     |     |     |     |     |
| 6  | <i>Mycetohabitans</i> sp. M4 (MN840552)                     | --KSSAADMQASAPD-----                                                                                 | ----- | -----DASAASIAEASELTRAASTATQSV--                                      | TTAVADATDSGWDALKHIVPSLRPGMAVEFSDGGELAVTTE  |     |     |     |     |     |
| 7  | <i>M. endofungorum</i> M5 (MN840553)                        | --KSSAADLQASAPD-----                                                                                 | ----- | -----HASAASTTEASELTRAASTATQSV--                                      | TTAVADATDSGWDALKHIVPSLRPGMAVEFSDGGELAVTTE  |     |     |     |     |     |
| 8  | <i>Mycetohabitans</i> sp. M6 (MN840556)                     | --ESSAADAQASAPD-----                                                                                 | ----- | -----YASAASTAGAAEPTRAASTATQSI--                                      | TTAVADASDRGWDALKRIVPSLRPGMAVEFSDGGALVTTE   |     |     |     |     |     |
| 9  | <i>Mycetohabitans</i> sp. M7 (MN840551)                     | --KSSAADMQASASD-----                                                                                 | ----- | -----HASAASTAEASELTRAASTATQSV--                                      | TTAVADATDSGWDALKHIVPSLRPGMAVEFSDGGELAVTTE  |     |     |     |     |     |
| 10 | <i>Mycetohabitans</i> sp. M8 (MN840554)                     | --KSSAADRQASAPD-----                                                                                 | ----- | -----HASAASTAEASELTRAASTATQSV--                                      | TTAVTDATDSGWDALKRIVSSLRPGMAVEFSDACKLFTTTE  |     |     |     |     |     |
| 11 | <i>B. pseudomallei</i> (ZP04890375)                         | GFSVDVLERWAAEAG-----                                                                                 | ----- | -----LDDGNFRRQLNDRSIVSNNGYGEIPELGD                                   | DRASVFSAFSEIVARYRAGKSLKFSGGVGLLALG         |     |     |     |     |     |
| 12 | <i>B. pseudomallei</i> (ZP02502372)                         | GFSVDVLERWAAEAG-----                                                                                 | ----- | -----LDDGNFRRQLNDRSIVSNNGYGEIPELGD                                   | DRASVFSAFSEIVARYRAGKSLKFSGGVGLLALG         |     |     |     |     |     |
| 13 | <i>B. pseudomallei</i> (ZP02494128)                         | GFSVDVLERWAAEAG-----                                                                                 | ----- | -----LDDGNFRRQLNDRSIVSNNGYGEIPELGD                                   | DRASVFSAFSEIVARYRAGKSLKFSGGVGLLALG         |     |     |     |     |     |
| 14 | <i>X. euvesicatoria</i> (WP011347306)                       | LIQRGLLDHAGQPSDLPVG-----                                                                             | ----- | -----AATLDEELASDARTHFHQAIHGASRLLEHGD--                               | TSRVRSPRALFECLRNLLEWRDKLRLTEQRVIGLNTT      |     |     |     |     |     |
| 15 | <i>X. campestris</i> (AZR30894)                             | LIQRGLLDHVPQPIDTPDG-----                                                                             | ----- | -----AAHLGKELASVARNNFHQAVGNASRFLHEGD--                               | TSRVRSPRALFACLRNVMERLEWRDKLRLTEQRVIGLNTT   |     |     |     |     |     |
| 16 | <i>X. vasicola</i> (AVQ09097)                               | LIQRGLLDHVPQPIDTPDD-----                                                                             | ----- | -----AAPLGEKELASVARNNFHQAVGNASRFLHEGD--                              | TSRVRSPRALFACLRNVMERLEWRDKLRLTEQRVIGLNTT   |     |     |     |     |     |
| 17 | <i>X. citri</i> (ARR12757)                                  | LIQRGLLDHAGQPSDLPVG-----                                                                             | ----- | -----AAPLDEELASVARDHFHRAVGHASRFLHEGD--                               | TSRVKSPRALFECLRNLMERLEWRDKLRLTEQRVIGLNTT   |     |     |     |     |     |
| 18 | <i>X. campestris</i> (AKS22319)                             | LIQRGLLDHAGQPTDMPIG-----                                                                             | ----- | -----AAPLDEELASVARNNFHQAVGHASRFLHEGD--                               | TSRVRSPRALFECLRNLMERLEWRDKLRLTEQRVIGLNTT   |     |     |     |     |     |
| 19 | <i>X. oryzae</i> (AKO19890)                                 | LIQRGLLDHAIQPNTPAG-----                                                                              | ----- | -----AAPLDKELASLARNHFHQAVGNASRFLHEGD--                               | TSRVRSPRALFACLRNMERLEWRDKLRLTEQRVIGLNTT    |     |     |     |     |     |
| 20 | <i>X. oryzae</i> (ACD59124)                                 | LIQRGLLDHAIQPNTPAG-----                                                                              | ----- | -----AAPLDKELASVARNNFHQAVGNASRFLHEGD--                               | TSRVRSPRALFACLRNVMERLEWRDKLRLTEQRVIGLNTT   |     |     |     |     |     |
| 21 | <i>Burkholderia</i> sp. (WP013592484)                       | GFTLAALLESWFNASG-----                                                                                | ----- | -----MAAADARAEPSTARHLQAAHDLLANPGI--                                  | APLDRITTRNLRKQHLALMAQNVPGTGFTSYDGNALGIDAS  |     |     |     |     |     |
| 22 | <i>Burkholderia</i> sp. (ADN59567)                          | GFTLAALERCFNASG-----                                                                                 | ----- | -----MAADHPVRAQPAQRNLQAAHDLNPNPGI--                                  | APLQRITTHNLRQHLALMAQNIPGTGFTSYDGNALGIDAS   |     |     |     |     |     |
| 23 | <i>R. solanacearum</i> (YP003748288)                        | RLNHATLKEWARDAA-----                                                                                 | ----- | -----MPQRTETGEETFSSAMRRARNILRDPDK--                                  | DKPADMSADSMRDYLNKFMADHNI GNSMTFADGGALGVNTS |     |     |     |     |     |
| 24 | <i>R. solanacearum</i> (BAH04968)                           | GLPP-ARDSPIHPPPGGLIGLAPSGALLRSWSP---                                                                 | ---   | ---AAPAGPLEKALKSAERIEQQDD-LQLREKTIEAARELIESLLTTIDAGGKLRRLASGSALGVNTG |                                            |     |     |     |     |     |
| 25 | <i>R. solanacearum</i> (BAD42384)                           | GLPP-ARDSPIHPPPGGLIGLAPSGALLRSWSP---                                                                 | ---   | ---AAPAGPLEKALKSAERIEQQDD-LQLREKTIEAARELIESLLTTIDAGGKLRRLASGSALGVNTG |                                            |     |     |     |     |     |
| 26 | <i>R. solanacearum</i> (YP003747289)                        | KWIDEAASADSNPAA-----                                                                                 | ----- | -----SPMLRRAKAKIVEAGDIARGRIKLGKT--                                   | TLADFRDAMTDAIGTMPLGNYVRYFDGGTYGLNANMTVNQH  |     |     |     |     |     |
| 27 | <i>R. solanacearum</i> (WP013209172)                        | RWLDEAASFDPDPSA-----                                                                                 | ----- | -----SPTLHLARTKIAEAGGIERGRPIKQGA--                                   | TMADFRNAMTGAIDAMPLGNYVRYFDGGTYGASINMTVNQH  |     |     |     |     |     |
| 28 | <i>R. solanacearum</i> (WP011002069)                        | TWADEAWRLSGQAVP-----                                                                                 | ----- | -----EPIR--ANIDLVES---RLAGDIRPKPG--                                  | DTNAQLDAIGALVKQMPDIYDIRVSSGGTVGLGGVPSQSLA  |     |     |     |     |     |
| 29 | <i>R. solanacearum</i> (WP003275417)                        | RLTHATLEHWGHDA-----                                                                                  | ----- | -----MPQRSVDGKETVFAGAMRRARNILDPGK--                                  | DVPADMTADSMRAFKNFVIEHNGGNSMTFTDGGALGINTG   |     |     |     |     |     |
| 30 | <i>R. solanacearum</i> (WP003274509)                        | KWIDEAASADSNPSA-----                                                                                 | ----- | -----SPMLRRAKAKIVEAGDIARGRIKLGKT--                                   | TLADFRDAMTDAIGTMPLGNYVRYFDGGTYGLNANMTVNQH  |     |     |     |     |     |
| 31 | <i>R. solanacearum</i> (EAP71656)                           | RLDHATLGTWAHDA-----                                                                                  | ----- | -----MPQRTETGEETFSSAMRRARNILRDPDK--                                  | DKPADMTADSMRDHLKFMADHNI GNSMTFADGGALGVNTS  |     |     |     |     |     |
| 32 | <i>R. solanacearum</i> (EAP71039)                           | RLTHATLEHWGHDA-----                                                                                  | ----- | -----MPQRSVDGKETVFAGAMRRARNILDPGK--                                  | DVPADMTADSMRAFKNFVIEHNGGNSMTFTDGGALGINTG   |     |     |     |     |     |
| 33 | <i>R. solanacearum</i> (CBJ39728)                           | RWLDEARAFDSRASE-----                                                                                 | ----- | -----SPMLREAAEDLVKAGDIERGRPIKQGT--                                   | TLADFREALTGAIQMPGNYVRYFDGATYGANTNMVNQH     |     |     |     |     |     |
| 34 | <i>R. solanacearum</i> (CBJ35355)                           | QLSHATLKAWARDAA-----                                                                                 | ----- | -----MPQRTETGEETFSSAMRRARNILKPRG--                                   | DKPLDMTAGNMRFLKNFMAEHNVTMTFTDGGALGVNTG     |     |     |     |     |     |
| 35 | <i>R. solanacearum</i> (CAD17997)                           | NLNLGASNLVPTPPPQFIDAYPSGAVLRKWEQVDAGAASGFLRKALDTEARIEQQDD-LKLQEAIDAARGVIESLITTTIEGGGKLRRLASGTSIGVNTG |       |                                                                      |                                            |     |     |     |     |     |
| 36 | <i>R. solanacearum</i> (BAH47286)                           | TWADEAWRLSGQAVP-----                                                                                 | ----- | -----EPVR--ANIDLVES---RLAGDIRPKPG--                                  | DTNAQLDAIGALVKQMPDIYDIRVSSGGTVGLGGVPSQSLA  |     |     |     |     |     |
| 37 | <i>R. solanacearum</i> (BAH47283)                           | RWLDEARAFDPRASE-----                                                                                 | ----- | -----SPTLRAAADNIVKAGDIERGRPIKPRGT--                                  | TLADFREALTGAIQMPGNYVRYFDGATYGVTNMVNQH      |     |     |     |     |     |
| 38 | <i>R. solanacearum</i> (BAH04967)                           | NLNLGASNLHVAPPQFIDAYPSGAVLRKWEQVDAGAASGFLRKALDTEARIEQQDD-LKLQEAIDAARGVIESLITTTIEGGGKLRRLASGTSIGVNTG  |       |                                                                      |                                            |     |     |     |     |     |
| 39 | <i>R. solanacearum</i> (BAD42389)                           | RLSHATLATWARDAA-----                                                                                 | ----- | -----MPQRTETGEETFSSAMRRARNILEPGK--                                   | DKPVDMTADSMRAFKNFTGEHNVGNAMTFTDGGALGVNTG   |     |     |     |     |     |
| 40 |                                                             |                                                                                                      |       |                                                                      |                                            |     |     |     |     |     |





```

81                                     810       820       830       840       850       860       870       880       890       900
82                                     . . . . . | . . . . . | . . . . . | . . . . . | . . . . . | . . . . . | . . . . . | . . . . . | . . . . . |
83 M. rhizoxinica M1 (CBW77121) ARPRGILVQVARQPKADGSGY-----DDEAMEARMGHIIDTMMSLSPAGATAESRGTREQCWNALAQSLVGAR--DVSVGWIDGTVDKCRHGSSTGVP
84 Mycetohabitans sp. M2 (MN840555) ARPRGILVQVARQPKADGSGY-----DDEAMEARMGHIIDTMMSLSPAGATAESRGTREQCWNALAKSLVGAR--DVSVGWIDGTVDKCRHGSSTGVP
85 Mycetohabitans sp. M3 (MN840550) ARPRGILVQVARQLKEDGSGY-----DDEAMQASVNHILDTMKSLSPAGAAAESRGTSEQCWNNTLAQSLVGAR--DVSVGWIEGTVDKCRHGASTGPL
86 Mycetohabitans sp. M4 (MN840552) ARPRGILVQVARQLKEDGSGY-----DDEAMQASVNHILDTMKSLSPAGAAAESRGTSEQCWNNTLAQSLVGAR--DVSVGWIEGTVDKCRHGASTGPL
87 M. endofungorum M5 (MN840553) ARPRGILVQVARQLKEDGSGY-----DDEVMQARVNHILDTMKSLSPAGAAAESRGTSEQCWNNTLAQSLVGAR--DVSVGWIEGTVDKCRHGASTGPL
88 Mycetohabitans sp. M6 (MN840556) ARPRGILVQVARQPKADGSGY-----DDEAMEARMGHIIDTMMSLSPAGATAESRGTREQCWNALAQSLVGAR--DVSVGWIDGTVDKCRHGSSTGVP
89 Mycetohabitans sp. M7 (MN840551) ARPRGILVQVARQLKEDGSGY-----DDEAMQASVNHILDTMKSLSPAGAAAESRGTSEQCWNNTLAQSLVGAR--DVSVGWIEGTVDKCRHGASTGPL
90 Mycetohabitans sp. M8 (MN840554) ARPRGILVQVARQLKDDGSGY-----DDEAMQASVNHILDTMKSLSSAGATAESRGTSEQCWNNTLAQSLVGAR--DVSVGWIEGTVDKCRHAASTGPL
91 B. pseudomallei (ZP04890375) TREKGAIVRFVPRAGSLGGGE-----AWRGWAQDCLSIIGNSADS-----ADLLERLAE EYV NAG--EIGIGMTEKEENVISSSAAVGAG
92 B. pseudomallei (ZP02502372) SREKGAIVRFVPRAGSLGGGE-----AWRGWAQDCLSIIGNSADS-----ADLLERLAE EYV NAG--EIGIGMTEKEENVISSSAAVGAG
93 B. pseudomallei (ZP02494128) TREKGAIVRFVPRAGSLGGGE-----AWRGWAQDCLSIIGNSADS-----ADLLERLAE EYV NAG--EIGIGMTEKEENVISSSAAVGAG
94 X. euvesicatoria (WP011347306) GIEHGVQIRVPRRKGQEELEQ-----RAQFLAMFEHLLQLAEQSGDDAGQLSERDFLGE LLAHHP SIT--VGLIGHAERNSTAT ESSL SVAAG
95 X. campestris (AZR30894) GVEHGVQIRVPRRKGQEELEQ-----RAQFLAMFEHLLQLAEQSGDDTAQLTERDFLAE LLAHHP SIT--VGLIGHAERNST ESSL SVAAG
96 X. vasicola (AVQ09097) GVEHGVQIRVPRRKGQEELEQ-----RAQFLAMFEHLLQLAEQSGDDTAQLTERDFLAE LLAHHP SIT--VGLIGHAERNST ESSL SVAAG
97 X. citri (ARR12757) GIEHGVQIRVPRRKGQEELEQ-----RAQFLAMFEHLLQLAEQSGDDAGQLSERDFLGE LLAHHP SIT--VGLIGHAERNATAT ESSL SVAAG
98 X. campestris (AKS22319) SIEHGVQIRVPRRKGQEELEQ-----RAQFLAMFEHLLQLAEQSGDDAGQLTERDFLGE LLAHHP SIT--VGLIGHAERNASAT ESSL SVAAG
99 X. oryzae (AKO19890) GIEHGVQIRVPRRKGQEELEQ-----RAQFLAMFEHLLQLAEQSGDDTSQLTERDFLAE LLAHHP SIT--VGLIGHAERNST ESSL SVAAG
100 X. oryzae (ACD59124) GIEHGVQIRVPRRKGQEELEQ-----RAQFLAMFEHLLQLAEQSGDDTAQLTERDFLAE LLAHHP SIT--VGLIGHAERNST ESSL SVAAG
101 Burkholderia sp. (WP013592484) AREQSVVLRARRLAPTPATAA-----LEAELWHKDSRQMVNAYWDAAEQ--AQTPEEFMQILAAGIADNERISL--SSQNNNATSITATPLTVGGVARAN
102 Burkholderia sp. (ADN59567) AREESVVLRARRLAPTPATAE-----LEAELWHKDSQQMVNAYWDAAEQ--AQTPEEFMQILAAGIADNERISL--SSQNNNATTVTATPLTVGGVARAN
103 R. solanacearum (YP003748288) TNPVGVRLRFSTQRKEDGSSM-----NSD-AMRKQMSDMIYMF DACC---PAKRHLSPAQLWEDFAVHHFDQ--KNLSVGWADYSSLNSKMGGSVTLT
104 R. solanacearum (BAH04968) GVMFRAVRQLDRAQQTGGYHDWEAVKYDDTATRQALISLSNWLFEQAT--EHRQRPLEREAIWNALALHCGTG--NTISVGWVDQQRRLRHKLRLSGG
105 R. solanacearum (BAD42384) GVMFRAVRQLDRAQQTGGYHDWEAVKYDDTATRQALISLSNWLFEQAT--EHRQRPLEREAIWNALALHCGTG--NTISVGWVDQQRRLRHKLRLSGG
106 R. solanacearum (YP003747289) SAPAGVVIIRTG---LSYGADG-----KATSAWRDNVAEVRFLFQTAAL--GQTRPVPPERMW EQFAERFFRT--PDISVNWRDQRRSSE TVTKHGSSA
107 R. solanacearum (WP013209172) SAPAGVVIIRTG---LSYDAEG-----KPTSAWRDNVADVTRFLFQTAAV--GQSARPVPPDRMWEQFADRFRT--PDISVNWRDQRRSHTVTKHGSSA
108 R. solanacearum (WP011002069) GGPGRVTVIRTR---RSDDQP-----GRPDARWTTMLEVLHATRAGPN--SDAPR--NAREMWSGLARRFWND--PAC SINWTD SRSTTSATSGSASAT
109 R. solanacearum (WP003275417) NHPVGVRLRFARQRNASGNM-----VDKGMVRRQMETMVDYLF DACC---PAKRHLSPAALWEDFANHHFDQ--ENLSVAWQDYSSALSSRMGVSVTGS
110 R. solanacearum (WP003274509) SAPAGVVIIRTG---LSYGADG-----KATSAWRDNVAEVRFLFQTAAL--GQATRPVPPERMW EQFAERFFRT--PDISVNWRDQRRSSE TVTKHGSSA
111 R. solanacearum (EAP71656) TNPVGVRLRFSTQRKEDGSGM-----NSD-AMRKQMSDMIYMF DACC---PAKRHLSPAQLWEDFAVHHFDQ--KNLSVGWADYSTLNSKMGGSVTLT
112 R. solanacearum (EAP71039) NHPVGVRLRFARQRNASGNM-----VDKGMVRRQMETMVDYLF DACC---PAKRHLSPAALWEDFANHHFDQ--ENLSVAWQDYSSALSSRMGVSVTGS
113 R. solanacearum (CBJ39728) SAPVGVIVRTG---LTYGTDG-----KATNAWRDNVADVTRFLFQSAAE--GQAARPVPPDRMWEQFSARFFRT--PDISVNWRDQRRSHTVTKHGSSA
114 R. solanacearum (CBJ35355) TNPTGVRLRFTTQRKEDGTAM-----NSD-AMRKQMSDMVDYMF DACC---PAKRHLSPSELWEDFAVHHFDQ--KHL SVGWEDYSSLNSKMGGAITAT
115 R. solanacearum (CAD17997) GVMYRAVRQVT---QAAGPHADWDVAVKYDDAATREAMIALSNWLFQAT--EHRERPPGADAVWNALAQHCSGAGADAI SVGWVDQQRKHLRHKL RVGGG
116 R. solanacearum (BAH47286) GGPGRVTVIRTR---RSDDQP-----GRPDARWTTMLEVLHAARSAGPN--SDAPR--NAREMWSGLARRFWND--PAC SINWTD SRSTTSATSGSASAT
117 R. solanacearum (BAH47283) SAPVGVIVRTG---LTYGADG-----KATSAWRDNVADVTRFLFQTAAE--GQAARPVPPDRMWEQFSARFFRT--PDISVNWRDQRRSHTVTKHGSSA
118 R. solanacearum (BAH04967) GVMYRAVRQVT---QAAGPHADWDVAVKYDDAATREAMIALSNWLFQAT--EHRERPPGADAVWNALAQHCSGAGADAI SVGWVDQQRKHLRHKL RVGGG
119 R. solanacearum (BAD42389) TNPTGVRLRFTTQRKDDGSAM-----NSD-AMRKQMSDMVDYMF EACC---PKRHLSPSALWEDFAVHHFDQ--KNLSVAWEDYASVNSKMGASVTLT

```

|     | 910                                     | 920                           | 930                                                                  | 940                                                 | 950            | 960 | 970 | 980 | 990 | 1000 |
|-----|-----------------------------------------|-------------------------------|----------------------------------------------------------------------|-----------------------------------------------------|----------------|-----|-----|-----|-----|------|
| 121 |                                         |                               |                                                                      |                                                     |                |     |     |     |     |      |
| 122 |                                         |                               |                                                                      |                                                     |                |     |     |     |     |      |
| 123 | <i>M. rhizoxinica</i> M1 (CBW77121)     | ASAGVPIGLPHPF                 | GMSTSVSVVPSGKHVHN                                                    | -ISTSRSDSGRMSTEKRHAERSIEVKVEVRVGVASVSATLSSNPKSGISTG | -----P         |     |     |     |     |      |
| 124 | <i>Mycetohabitans</i> sp. M2 (MN840555) | VSAGVPIGLPHPF                 | GMSTSVSVVPSGKHVNN                                                    | -ISTSRSDSGRMSTEKRHAERSIEVKVEVRVGVASVSATLSSNPKSGVNTG | -----P         |     |     |     |     |      |
| 125 | <i>Mycetohabitans</i> sp. M3 (MN840550) | VSTGVPIGLPAPLSTSVSASVPSGKHVNS | -ISTSRSDSGRMSTEKRHTERSIEVKIEAKVGVASISATSSSPKSGVSTG                   | -----P                                              |                |     |     |     |     |      |
| 126 | <i>Mycetohabitans</i> sp. M4 (MN840552) | VSTGVPIGLPAPLSTSVSASVPSGKHVNS | -ISTSRSDSGRMSTEKRHTERSIEVKIEAKVGVASISATSSSPKSGVSTG                   | -----P                                              |                |     |     |     |     |      |
| 127 | <i>M. endofungorum</i> M5 (MN840553)    | VSAGVPLGLPAPFSTSVSASVPSGKHVNS | -ISTSRSDSGRMSTEKRHTERSIEVKIEAKVGVASISATSSSPKSGVSTG                   | -----P                                              |                |     |     |     |     |      |
| 128 | <i>Mycetohabitans</i> sp. M6 (MN840556) | ASAGVPIGLPHPF                 | GMSTSVSVVPSGKHVHN                                                    | -ISTSRSDSGRMSTEKRHAERSIEVKVEVRVGVASVSATLSSNPKSGISTG | -----P         |     |     |     |     |      |
| 129 | <i>Mycetohabitans</i> sp. M7 (MN840551) | VSTGVPIGLPAPLSTSVSASVPSGKHVNS | -ISTSRSDSGRMSTEKRHTERSIEVKIEAKVGVASISATSSSPKSGVSTG                   | -----P                                              |                |     |     |     |     |      |
| 130 | <i>Mycetohabitans</i> sp. M8 (MN840554) | VSVGIPNVLPAFLGASVSASVPSGKHVNS | -ISTSRSDSGHMSTEKRHAERSIEVKVEAKVGVASVAATSSSPKSSVSTG                   | -----P                                              |                |     |     |     |     |      |
| 131 | <i>B. pseudomallei</i> (ZP04890375)     | VKASSSGG---                   | DFRGGAGVSASIGVKREWRRHKAVRELDNKMGNHFKDQSSSTSVTWNAGLNASESYQLNPTPDFSTAS | -----AS                                             |                |     |     |     |     |      |
| 132 | <i>B. pseudomallei</i> (ZP02502372)     | VKASSSGG---                   | DFRGGAGVSASIGVKREWRRHKAVRELDNKMGNHFKDQSSSTSVTWNAGLNASESYQLNPTPDFSTAS | -----AS                                             |                |     |     |     |     |      |
| 133 | <i>B. pseudomallei</i> (ZP02494128)     | VKASSSGG---                   | DFRGGAGVSASIGVKREWRRHKAVRELDNKMGNHFKDQSSSTSVTWNAGLNASESYQLNPTPDFSTAS | -----AS                                             |                |     |     |     |     |      |
| 134 | <i>X. euvesicatoria</i> (WP011347306)   | VRVGNMDGQPRRATL               | LGASLGVKARRETSRS                                                     | ----QTPIEGYMTMVLKDSSAQSRVEIAGRASASVVAQQWTDPGTGNAPP  | -----TPVARLSMA |     |     |     |     |      |
| 135 | <i>X. campestris</i> (AZR30894)         | VRVGNMDGRPRRATL               | LGASLGIKARRETSRT                                                     | ----QTPIEGYMTMVLKDSSAQSRVEIAGRASASLVAQQWTPSTGNAPP   | -----NPIARLSMA |     |     |     |     |      |
| 136 | <i>X. vasicola</i> (AVQ09097)           | VRVGNMDGRPRRATL               | LGASLGLKARRETSRT                                                     | ----QTPIEGYMTMVLKDSSAQSRVEIAGRASASLVAQQWTPSTGNAPP   | -----NPIARLSMA |     |     |     |     |      |
| 137 | <i>X. citri</i> (ARR12757)              | VRVGNMDGRPRRATL               | LGASLGLKARRETSRS                                                     | ----QTPIEGYMTMVLKDSSAQSRVEIAGRASASLVAQQWTHPSTGNAPP  | -----TPVARLSMA |     |     |     |     |      |
| 138 | <i>X. campestris</i> (AKS22319)         | VRVGNMDGKPRRATL               | LGASLGLKARRETSRS                                                     | ----QTPIEGYMTMVLKDSSAQSRVEIAGRASASVVAQQWTHPSIGNAPP  | -----TPVARLSMA |     |     |     |     |      |
| 139 | <i>X. oryzae</i> (AKO19890)             | VRVGNMDGRPRRATL               | LGASLGLKARRETSRS                                                     | ----QTPIEGYMTMVLKDSTAQSRVDIAGRASASLVAQQWTPSAGNAPP   | -----SPVARLSMA |     |     |     |     |      |
| 140 | <i>X. oryzae</i> (ACD59124)             | VRVGNMDGRPRRATL               | LGASLGLKARRETSRS                                                     | ----QTPIEGYMTMVLKDSTAQSRVDIAGRASASLVAQQWTPSAGNAPP   | -----SPVARLSMA |     |     |     |     |      |
| 141 | <i>Burkholderia</i> sp. (WP013592484)   | VFGASSS----                   | ERVGGYAGVSSG-VTLYS-AADLKEGALASTIGATAVQGSLTASVG--AQFAPRAAFALGDGTGEIGS | -----VSPGA                                          |                |     |     |     |     |      |
| 142 | <i>Burkholderia</i> sp. (ADN59567)      | VFGANSP----                   | ERVGAYAGVSSG-VTLYS-AADLKEGALASTIGATAVQGLTASAG--TQFAPRALMLGDGAGEVGS   | -----VSPGA                                          |                |     |     |     |     |      |
| 143 | <i>R. solanacearum</i> (YP003748288)    | ARAGVTTEDGQAIRAGGSIGYGV       | T-WNPFFT-MGSRKEKSGTAPILREDRGSAHIHTLTATASGQLPAVPLPVEPDGAANG           | -----LGVPG                                          |                |     |     |     |     |      |
| 144 | <i>R. solanacearum</i> (BAH04968)       | VQARISSK-GAPIRVGPSARLTAE      | -ATSRD-ATATRETAGIMRVEQSVQGGHLLTLRAGLTYSAGKMFYTSAAPDAATG              | ----SDATGGRHRI                                      | QGGFNG         |     |     |     |     |      |
| 145 | <i>R. solanacearum</i> (BAD42384)       | VQARISSK-GAPICVGPSARLTAE      | -ATSRD-ATATRETAGIMRVEQSVQGGHLLTLRAGLTYSAGKMFYTSAAPDAATG              | ----SDATGGRHRI                                      | QGGFNG         |     |     |     |     |      |
| 146 | <i>R. solanacearum</i> (YP003747289)    | MRVAAGP----                   | VRVLPFAFVGHG-HVLAS-KNDRVDINGWLRGVERARARASNVHVGASLAALAPAVGHFNSRSGFPD  | -----ITLPS                                          |                |     |     |     |     |      |
| 147 | <i>R. solanacearum</i> (WP013209172)    | VRVAAGP----                   | VRVLPFAFVGHG-RLLAS-KNDRIDDNGWLRGVERARARASNVHVSASLAAVAPAIHGFNSHSGFPDS | -----ITLPS                                          |                |     |     |     |     |      |
| 148 | <i>R. solanacearum</i> (WP011002069)    | ARVGTAD----                   | TKWGPALGATLR-HVARA-AHRQWDKTGNHAI                                     | DVSTHNSGRATAVAATLVEALPGIP-VPNGSGHLAA                | -----LSFPT     |     |     |     |     |      |
| 149 | <i>R. solanacearum</i> (WP003275417)    | ARLGVKTDDGGETV                | RVTGGLFGYAFN-WSPFT-RGKRQEASGRFPVMRNERGVMYSH                          | TVTATGTQLPSVPLPDSHEGVSDS                            | -----LGLPN     |     |     |     |     |      |
| 150 | <i>R. solanacearum</i> (WP003274509)    | VRVAAGP----                   | VRVLPFAFVGHG-QVLAS-KNDRVDINGWLRGVERARARASNVHVGASLAALAPAVGHFNSRSGFPDS | -----ITLPS                                          |                |     |     |     |     |      |
| 151 | <i>R. solanacearum</i> (EAP71656)       | ARAGVTTEDGQAIRAGGSIGYGV       | T-WNPFFT-MGSRKEKSGTAPILREDRGSAHIHTLTATASGQLPAVPLPAQPDGATNS           | -----LGVPA                                          |                |     |     |     |     |      |
| 152 | <i>R. solanacearum</i> (EAP71039)       | ARLGVKTDDGGETV                | RVTGGLFGYAFN-WSPFT-RGKRQEASGRFPVMRNERGVMYSH                          | TVTATGTQLPSVPLPDSHEGVSDS                            | -----LGLPN     |     |     |     |     |      |
| 153 | <i>R. solanacearum</i> (CBJ39728)       | VRVAAGQ----                   | VRVLPFAFVGHG-RVLAS-KNDRVDINGWLRGVERARARASNVHVSGLAAVAQVGHFNSRSGFPES   | -----VTLPS                                          |                |     |     |     |     |      |
| 154 | <i>R. solanacearum</i> (CBJ35355)       | ARAGVKTADGQTVRGGGSIGYGV       | T-WNPFFT-MGERKEKSGTAPILREDRGSAHIHTVTVAAASGQLPGVPLPDSLDAANS           | -----LGVPS                                          |                |     |     |     |     |      |
| 155 | <i>R. solanacearum</i> (CAD17997)       | VNVRVTAP-AAPVVRVGVVRLTGE      | -ITSRD-TTAMRETTGIMRAEQYSQGGHMTVRAGVNYAVGKRFYTS                       | PAQDAAAAGPTASVPSGGRRSITQGGFNG                       |                |     |     |     |     |      |
| 156 | <i>R. solanacearum</i> (BAH47286)       | ARVGTAD----                   | TKWGPALGATLR-HVARA-AHRQWDKTGNHAI                                     | DVSTHNSGRATAVAATLVEALPGIP-VPNGSGHLAA                | -----LSFPT     |     |     |     |     |      |
| 157 | <i>R. solanacearum</i> (BAH47283)       | VRVAAGA----                   | VRVLPFAFVGHG-QVLAS-KNDRVDINGWLRGVERARARASNVHVSGLAAVAQVGHFNSRSGFPES   | -----VTLPS                                          |                |     |     |     |     |      |
| 158 | <i>R. solanacearum</i> (BAH04967)       | VNVRVTAP-AAPVVRVGVVRLTGE      | -ITSRD-TTAMRETTGIMRAEQYSQGGHMTVRAGVNYAVGKRFYTS                       | PAQDAAAAGPTASVPSGERRSITQGGFNG                       |                |     |     |     |     |      |
| 159 | <i>R. solanacearum</i> (BAD42389)       | ARAGVTTQDQTVRAGGSVGYGFT       | -WNPFFT-IGQRQEKSGIAPILREDRGSAHLH                                     | AVTVAASVQLPAGFLPDPDGAANS                            | -----LGVPS     |     |     |     |     |      |

|     |                                         |                                                                         |           |          |              |           |              |              |           |                        |                                  |                                  |                       |                       |                             |              |
|-----|-----------------------------------------|-------------------------------------------------------------------------|-----------|----------|--------------|-----------|--------------|--------------|-----------|------------------------|----------------------------------|----------------------------------|-----------------------|-----------------------|-----------------------------|--------------|
|     |                                         | 1010                                                                    | 1020      | 1030     | 1040         | 1050      | 1060         | 1070         | 1080      | 1090                   | 1100                             |                                  |                       |                       |                             |              |
| 161 |                                         | ..... ..... ..... ..... ..... ..... ..... ..... ..... ..... ..... ..... |           |          |              |           |              |              |           |                        |                                  |                                  |                       |                       |                             |              |
| 162 |                                         | SSKRLW                                                                  | DKQLYQAKV | SLSR     | TLQS         | YQGGKIE   | PRA          | CFLD         | VDFL      | DATAYE                 | YATRQLLDHNGDRDDAGIKAVR           | TYLEQKRAQSAKPLADQAASAVKNVLELGNGT |                       |                       |                             |              |
| 163 | <i>M. rhizoxinica</i> M1 (CBW77121)     | SSKRLW                                                                  | DKQLYQAKV | SLSR     | TLQS         | YQGGKIE   | PRA          | CFLD         | VDFL      | DATAYE                 | YATRQLLDHNGDRDDAGIKAVR           | TYLEQKRAQSAKPLADQAASAVKNVLELGNGT |                       |                       |                             |              |
| 164 | <i>Mycetohabitans</i> sp. M2 (MN840555) | SSKRLW                                                                  | DKQLYQAKV | SLSR     | TLQS         | YQGGKIE   | PRA          | CFLD         | VDFL      | DATAYE                 | YATRQLLDHNGDRDDAGIKAVR           | TYLEQKRAQSAKPLADQAASAVKNVLELGNGT |                       |                       |                             |              |
| 165 | <i>Mycetohabitans</i> sp. M3 (MN840550) | TSKRLW                                                                  | DKQLYQAKV | SLSR     | TLQTHHGKID   | PRA       | CFLD         | VDFL         | DATAYE    | YATRQLLDHNGDRDDAGIKAVR | TYLEQKRAQSAKPLADQAASAVKNVLELGNGT |                                  |                       |                       |                             |              |
| 166 | <i>Mycetohabitans</i> sp. M4 (MN840552) | TSKRLW                                                                  | DKQIYQVKV | SLSR     | KLQTHHGKID   | PRA       | CFLD         | VDFL         | DATAYE    | YATRQLLDHNGDRDDAGIKAVR | TYLEQKRAQSAKPLADQAASAVKNVLELGNGT |                                  |                       |                       |                             |              |
| 167 | <i>M. endofungorum</i> M5 (MN840553)    | TSKRLW                                                                  | DKQIYQVKV | SLSR     | TLQTHHGKID   | PRA       | CFLD         | VDFL         | DATAYE    | YATRQLLDHNGDRDDAGIKAVR | TYLEQKRAQSAKPLADQAASAVKNVLELGNGT |                                  |                       |                       |                             |              |
| 168 | <i>Mycetohabitans</i> sp. M6 (MN840556) | SSKRLW                                                                  | DKQLYQAKV | SLSR     | TLQS         | YQGGKIE   | PRA          | CFLD         | VDFL      | DATAYE                 | YATRQLLDHNGDRDDAGIKAVR           | TYLEQKRAQSAKPLADQAASAVKNVLELGNGT |                       |                       |                             |              |
| 169 | <i>Mycetohabitans</i> sp. M7 (MN840551) | TSKRLW                                                                  | DKQLYQAKV | SLSR     | TLQTHHGKID   | PRA       | CFLD         | VDFL         | DATAYE    | YATRQLLDHNGDRDDAGIKAVR | TYLEQKRAQSAKPLADQAASAVKNVLELGNGT |                                  |                       |                       |                             |              |
| 170 | <i>Mycetohabitans</i> sp. M8 (MN840554) | TSKRLW                                                                  | DKQIYQVKV | SLSR     | TLQVSYQGGKID | PRA       | CFLD         | VDFL         | DATAYE    | YATRQLLDHNGDRDDAGIKAVR | TYLEQKRAQSAKPLADQAASAVKNVLELGNGT |                                  |                       |                       |                             |              |
| 171 | <i>B. pseudomallei</i> (ZP04890375)     | AQAFSVGG                                                                | TLFS      | SAKEGAS  | VAIRLRDGMV   | DELA      | LAILDR       | TRNGRR       | GV        | ELIARDY                | PLVWKAMGKTDAE                    | EGE                              | AALNR                 | -----FFASELGRGVNRPLRP |                             |              |
| 172 | <i>B. pseudomallei</i> (ZP02502372)     | AQAFSIGG                                                                | TLFS      | SVKEGTS  | VAIRLRDGMV   | DAELA     | LAILDR       | TRNGRR       | AVDLIARDY | PIVWKAMGKTDAE          | EGE                              | AALNR                            | -----FFASELGRGVNRPLRP |                       |                             |              |
| 173 | <i>B. pseudomallei</i> (ZP02494128)     | AQAFSIGG                                                                | TLFS      | SVKEGTS  | VAIRLRDGMV   | DAELA     | LAILDR       | TRNGRR       | AVDLIARDY | PIVWKAMGKTDAE          | EGE                              | AALNR                            | -----FFASELGRGVNRPLRP |                       |                             |              |
| 174 | <i>X. euvesicatoria</i> (WP011347306)   | TLDLGS                                                                  | RE        | LRSAG    | SNTFSTLW     | MFNNEIDPV | RTDRGF       | EFFNFAS      | FERE      | VKRNWQ                 | LWTHY                            | GISK                             | LQGGK                 | VDDQR                 | -----LYMVAERQLQDFIDRVRLHMQD |              |
| 175 | <i>X. campestris</i> (AZR30894)         | ALDLGS                                                                  | RE        | VHSAG    | SNTFSTLW     | MFNNEIDPV | RTDRGF       | EFFNFAS      | FERE      | VKRNWQ                 | LWTHY                            | GISK                             | LQGGK                 | VDDQR                 | -----LYMVAERQLQDFIDRVRLHMQD |              |
| 176 | <i>X. vasicola</i> (AVQ09097)           | ALDLGS                                                                  | RE        | VHSAG    | SNTFSTLW     | MFNNEIDPV | RTDRGF       | EFFNFAS      | FERE      | VKRNWQ                 | LWTHY                            | GISK                             | LQGGK                 | VDDQR                 | -----LYMVAERQLQDFIDRVRLHMQD |              |
| 177 | <i>X. citri</i> (ARR12757)              | TLDLGS                                                                  | RE        | LRSAG    | SNTFSTLW     | MFNNEIDPV | RTDRGF       | EFFNFAS      | FERE      | VKRNWQ                 | LWTHY                            | GISK                             | LQGGK                 | VDEQR                 | -----LYMVAERQLQDFIDRVRLHMQD |              |
| 178 | <i>X. campestris</i> (AKS22319)         | TLDLGS                                                                  | RE        | LRSAG    | SNTFSTLW     | MFNNEIDPV | RTDRGF       | EFFNFAS      | FERE      | VKRNWQ                 | LWTHY                            | GISK                             | LQGGK                 | VDDQR                 | -----VYMVAERQLQDFIDRVRLHMQD |              |
| 179 | <i>X. oryzae</i> (AKO19890)             | ALDLGS                                                                  | RE        | LRSAG    | SNTFSTLW     | MFNNEIDPV | RTDRGF       | EFFNFAS      | FERE      | VKRNWQ                 | LWTHY                            | GISK                             | LQGGK                 | VDDQR                 | -----LYMVAERQLQDFIDRVRLHMQD |              |
| 180 | <i>X. oryzae</i> (ACD59124)             | SLDLGS                                                                  | RE        | LRSAG    | SNTFSTLW     | MFNNEIDPV | RTDRGF       | EFFNFAS      | FERE      | VKRNWQ                 | LWTHY                            | GISK                             | LQGGK                 | VDDQR                 | -----LYMVAERQLQDFIDRVRLHMQD |              |
| 181 | <i>Burkholderia</i> sp. (WP013592484)   | KTGGAA                                                                  | VELTPFGR  | SSVVFAMR | DNRG         | FVAEY     | TMQDRMFRN    | AD           | WARSVRAN  | -----PAWAHGIGA         | -----ERLQQVIE                    | QTQQ                             | --ES                  |                       |                             |              |
| 182 | <i>Burkholderia</i> sp. (ADN59567)      | KTLLASA                                                                 | AVEATPFGR | SSVVFAMR | DNRG         | FVAEY     | TMQDRMFRN    | AD           | WARSVRAN  | -----PAWLQGGIGA        | -----QRLQQVIE                    | QTQL                             | --ES                  |                       |                             |              |
| 183 | <i>R. solanacearum</i> (YP003748288)    | VPVASAT                                                                 | YMLGNGGF  | NANIR    | TLVER        | GRLSEAF   | TYRDL        | SERN         | IDDFLKFAN | D                      | PARRKEWEAMCGAE                   | QGGAYAEHG                        | --AGG                 | PD                    | LKKRLDDDFL                  |              |
| 184 | <i>R. solanacearum</i> (BAH04968)       | GTPLSW                                                                  | SKQFAEL   | GHTVE    | VRTIHL       | NGRLAD    | RVSYSD       | KRYKSGTE     | F         | LALIR                  | TRQ                              | RQVWID                           | MLSR                  | KPGMTREAAE            | -----QEFKVFCDMVER           |              |
| 185 | <i>R. solanacearum</i> (BAD42384)       | GTPLSW                                                                  | SKQFAEL   | GHTVE    | VRTIHL       | NGRLAD    | RVSYSD       | KRYKSGTE     | F         | LALIR                  | TRQ                              | RQVWID                           | MLSR                  | KPGMTREAAE            | -----QEFKVFCDMVER           |              |
| 186 | <i>R. solanacearum</i> (YP003747289)    | TPIVGL                                                                  | SANILPS   | GT       | SVTLRRV      | DEHG      | RLNPRFIRRLVE | FI           | DPSAF     | L                      | SHMQAR                           | ----MPRIART                      | DASRE                 | -----KVGAFMSAMKDM     |                             |              |
| 187 | <i>R. solanacearum</i> (WP013209172)    | APIVGL                                                                  | VAA       | NIMPS    | GT           | SVTLRRV   | DEHG         | RLNPRFIRRLVE | FI        | DPSAF                  | L                                | SHMQAR                           | ----LPRIART           | DASRA                 | -----KVGAFMSAMDDM           |              |
| 188 | <i>R. solanacearum</i> (WP011002069)    | QPVVG                                                                   | I         | GTT      | LFTTT        | QNAALR    | IGR          | DSGRI        | IPKHTFRD  | TE                     | FGTFKAFK                         | QFVD                             | THRSE                 | WL                    | TALGGT                      |              |
| 189 | <i>R. solanacearum</i> (WP003275417)    | VPIHS                                                                   | ATYMLG    | EGGF     | NAIV         | RTLME     | HGRHSE       | FTYRDL       | SERS      | I                      | HDFL                             | KIANEP                           | GR                    | KAWEALCAAE            | QGGDAARG                    | -----KERLDDF |
| 190 | <i>R. solanacearum</i> (WP003274509)    | TPIVGL                                                                  | SANILPS   | GT       | SVTLRRV      | DEHG      | RLNPRFIRRLVE | FI           | DPSAF     | L                      | SHMQAR                           | ----MPRIART                      | DASRE                 | -----KVGAFMSAMKDM     |                             |              |
| 191 | <i>R. solanacearum</i> (EAP71656)       | VPVASAT                                                                 | YMLGNGGF  | NANIR    | TLVER        | GRLSEAF   | TYRDL        | SERS         | IDDFLKFAN | D                      | PARRKEWEAVCGAE                   | QGGAYAEHG                        | --EGG                 | PD                    | LKKRLDDDFL                  |              |
| 192 | <i>R. solanacearum</i> (EAP71039)       | VPIHS                                                                   | ATYMLG    | EGGF     | NAIV         | RTLME     | HGRHSE       | FTYRDL       | SERS      | I                      | HDFL                             | KIANEP                           | GR                    | KAWEALCAAE            | QGGDAARG                    | -----KERLDDF |
| 193 | <i>R. solanacearum</i> (CBJ39728)       | TPIVGL                                                                  | SANILPS   | GT       | SVTLRRV      | DEHG      | RLNPRFIRRLVE | FI           | DPSAF     | L                      | SHMQAR                           | ----LPQIAHSD                     | DASRA                 | -----KVGAFMSAMKDM     |                             |              |
| 194 | <i>R. solanacearum</i> (CBJ35355)       | VPVASAT                                                                 | YMLGNGGF  | NATV     | RTLLE        | RGRLSEAF  | TYRDL        | SERN         | IGDFLKFAN | D                      | PARRKEWEALCSAE                   | QGGAYADTGHGE                     | AGPDL                 | GKKRLDDDFL            |                             |              |
| 195 | <i>R. solanacearum</i> (CAD17997)       | GTPLTY                                                                  | T         | KQFAEHS  | H            | TAKLKT    | VHL          | DGR          | LAD       | RV                     | CFYD                             | KEYKSAKEYL                       | L                     | IRSAQD                | TWID                        |              |
| 196 | <i>R. solanacearum</i> (BAH47286)       | QPVVG                                                                   | I         | GTT      | L            | FATQ      | TNAALR       | IGR          | DSGRI     | IPKHTFRD               | TE                               | FGTFKAFK                         | QFVD                  | THRSE                 | WL                          |              |
| 197 | <i>R. solanacearum</i> (BAH47283)       | VPIV                                                                    | G         | AS       | N            | LPS       | GT           | SVTLRRV      | DEHG      | RLNPRFIRRLVE           | FI                               | DPSAF                            | L                     | SHMQAR                | ----LPQIAHSD                |              |
| 198 | <i>R. solanacearum</i> (BAH04967)       | GTPLTY                                                                  | T         | KQFAEHS  | H            | TAKLRT    | VHL          | DGR          | LAD       | RV                     | CFYD                             | KEYKSAKEYL                       | L                     | IRSAQD                | TWID                        |              |
| 199 | <i>R. solanacearum</i> (BAD42389)       | VPIAS                                                                   | ATYMLG    | NGGF     | NATIR        | TLE       | MR           | GR           | LSEAF     | TYRDL                  | SERN                             | IND                              | F                     | KIANEP                | GR                          |              |
| 200 |                                         | KAWEALCSAE                                                              | QGGAYAAH  | GKADAGP  | --GKKRLDDDFL | DKIQEM    | --AR         |              |           |                        |                                  |                                  |                       |                       |                             |              |

```

201                                     1110       1120       1130
202                                     ....|....|....|....|....|....|...
203 M. rhizoxinica M1 (CBW77121)      RQTDSHIHRYALTDPAAEQINLLQAHFEQHLYR
204 Mycetohabitans sp. M2 (MN840555) RQTDSHIHRYALTDPAAEQINLLQAHFEQHLYR
205 Mycetohabitans sp. M3 (MN840550) RQMHSIHRYALTDPAAEQINLLQAHFEQHLYR
206 Mycetohabitans sp. M4 (MN840552) RQMHSIHRYALTDPAAEQINLLQAHFEQHLYR
207 M. endofungorum M5 (MN840553)    RQTDSHIHRYALTDPAAEQINLLQAHFEQHLYR
208 Mycetohabitans sp. M6 (MN840556) RQTDSHIHRYALTDPAAEQINLLQAHFEQHLYR
209 Mycetohabitans sp. M7 (MN840551) RQMHSIHRYALTDPAAEQINLLQAHFEQHLYR
210 Mycetohabitans sp. M8 (MN840554) RQTDSHIHRYALTDPAAEQINLLQAHFEQHLYR
211 B. pseudomallei (ZP04890375)     EVPETYVASYRMTKEAASALNHRYAQIDLEQML
212 B. pseudomallei (ZP02502372)     EVPETYVASYRMTKEAASALNHRYAQIDLEQML
213 B. pseudomallei (ZP02494128)     EVPETYVASYRMTKEAASALNHRYAQIDLEQML
214 X. euvesicatoria (WP011347306)   NKFASLIVDWVLQAEAAPRLDALRAQAQLLRVA
215 X. campestris (AZR30894)         NKFASLIVDWVLQAEAAPRLDALRAQAQLLRVA
216 X. vasicola (AVQ09097)          NKFASLIVDWVLQAEAAPRLDALRAQAQLLRVA
217 X. citri (ARR12757)              NKFASLIVDWVLQAEAAPRLDALRAQAQLLRVA
218 X. campestris (AKS22319)         NKFASLIVDWVLQAEAAPRLDALRAQAQLLRVA
219 X. oryzae (AKO19890)             NKFASLIVDWVLQAEAAPRLDALRAQAQLLRVA
220 X. oryzae (ACD59124)             NKFASLIVDWVLQAEAAPRLDALRAQAQLLRVA
221 Burkholderia sp. (WP013592484)   SGEFSFGERWAIREERVPRLNQYLTLNQLRAR
222 Burkholderia sp. (ADN59567)      SGEFSFGERWVIADEYVPRLNQYLTLNQLRAR
223 R. solanacearum (YP003748288)    P-NQAHYMRWRLGEQERLAMDDYMAAARMAERG
224 R. solanacearum (BAH04968)       GNVSYLYRERLKPAIAREIEGQLDLADMHRAL
225 R. solanacearum (BAD42384)       GNVSYLYRERLKPAIAREIEGQLDLADMHRAL
226 R. solanacearum (YP003747289)    QGNLAYGESWKIRPEVTEVLNAYTDEIQLLKC
227 R. solanacearum (WP013209172)    QGNLAYGESWKIRPEVTEVLNAYTDEIQLLKC
228 R. solanacearum (WP011002069)    AGNLIMGERMHMTDEAARRL-----
229 R. solanacearum (WP003275417)    P-NQAYYMRWRLGTEERLAMDDYLGVAKIAERG
230 R. solanacearum (WP003274509)    QGNLAYGESWKIRPEVTEVLNAYTDEILLILKC
231 R. solanacearum (EAP71656)       P-NQAHYMRWRLGEQERLAIDDYMAAARMAERG
232 R. solanacearum (EAP71039)       P-NQAYYMRWRLGTEERLAMDDYLGVAKIAERG
233 R. solanacearum (CBJ39728)       QGNLAYGESWKIRPEVTEVLNAYTDEIQLMLKC
234 R. solanacearum (CBJ35355)       P-NQAHYMRWRLGEQERLAMDDYMAAARMAERG
235 R. solanacearum (CAD17997)       GPHIRYLLRERLRPAAAAREVEGHLDLANLHRAT
236 R. solanacearum (BAH47286)       AGNLIMGERMHMTDEAARRL-----
237 R. solanacearum (BAH47283)       QGNLAYGESWKIRPEVTEVLNAYTDEIQLMLKC
238 R. solanacearum (BAH04967)       GPHIRYLLRERLRPAAAAREVEGHLDLANLHRAT
239 R. solanacearum (BAD42389)       P-NQAHYMRWRLGEQERLAMDDYMAAARMADRG
240
241
242
243
244

```

**Fig. S1.** Alignment of predicted AWR proteins from endofungal *Mycetohabitans* species, plant pathogenic *R. solanacearum*, and plant-associated *Burkholderia* spp. modified from Sole *et al.* Sequences identified in this study are highlighted in bold (Table S3). GenBank accession numbers are indicated in brackets.

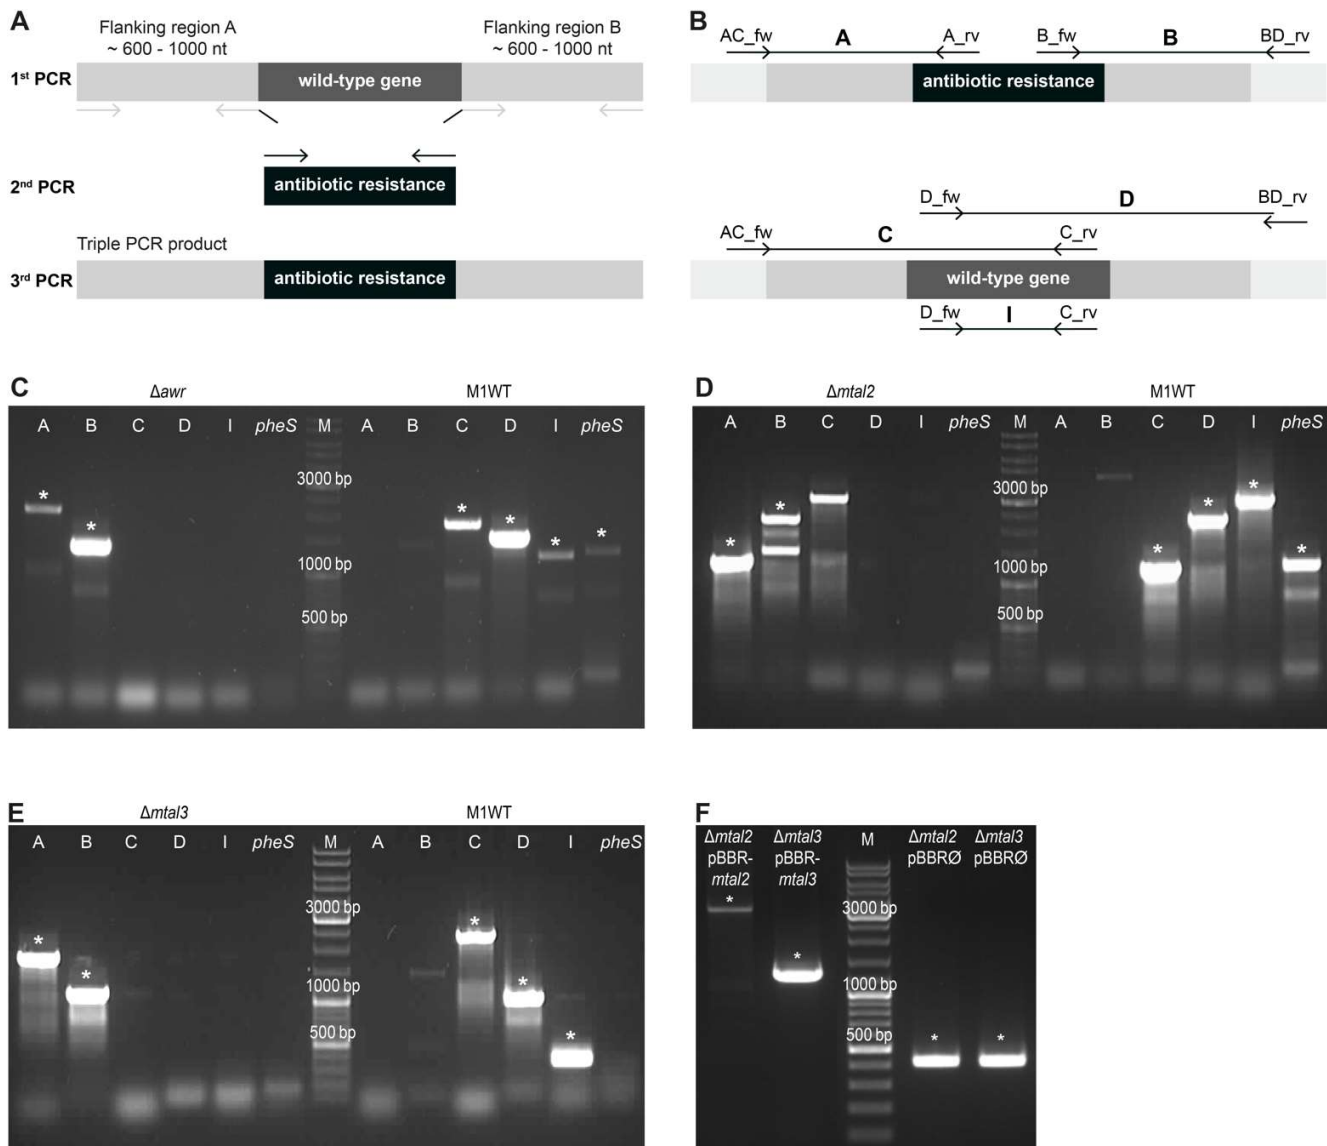

**Fig. S2. Confirmation of *M. rhizoxinica* AWR and MTAL mutant strains and their complementation by PCR.** (A) Schematic representation of the construction of mutant vector. (B) Schematic representation of the confirmations of successful gene inactivation. The PCR products of the mutant strain correspond to amplicons A and B, whereas products C and D are amplified from the wild type. Absence of contaminating *M. rhizoxinica* wild type (M1WT) in the mutant strains was confirmed by lack of amplification of an internal fragment (amplicon I) from the wild-type gene of interest. The removal of the mutant vector was confirmed by amplification of the counter-selection marker gene *pheS* (amplicons *pheS*). (C) The *awr* gene was deleted in *M. rhizoxinica* M1WT to generate *M. rhizoxinica*  $\Delta awr::Kan^R$  (*M. rhizoxinica*  $\Delta awr$ ). PCR products were obtained from genomic wild-type and mutant DNA using control primers listed in Table S4B. Bands corresponding to the expected sizes are indicated by asterisks (\*). (D) The *mtal2* gene was deleted in *M. rhizoxinica* HKI-454 to generate *M. rhizoxinica*  $\Delta mtal2::Kan^R$  (*M. rhizoxinica*  $\Delta mtal2$ ). PCR products were obtained from genomic wild-type and mutant DNA using control primers listed in Table S4B. Bands corresponding to the expected sizes are indicated by asterisks (\*). (E) The *mtal3* gene was deleted in *M. rhizoxinica* HKI-454 to generate *M. rhizoxinica*  $\Delta mtal3::Kan^R$  (*M. rhizoxinica*  $\Delta mtal3$ ). PCR products were obtained from genomic wild-type and mutant DNA using control primers listed in Table S4B. Bands corresponding to the expected sizes are indicated by asterisks (\*). (F) Colony PCRs were performed to confirm the presence of the relevant complementation plasmids in the strains *M. rhizoxinica*  $\Delta mtal2$  pBBR-*mtal2* and *M. rhizoxinica*  $\Delta mtal3$  pBBR-*mtal3*. *M. rhizoxinica* *mtal* mutant strains were also transformed with an empty control plasmid to generate the negative control strains *M. rhizoxinica*  $\Delta mtal2$  pBBR $\emptyset$  and *M. rhizoxinica*  $\Delta mtal3$  pBBR $\emptyset$ . PCR products were amplified using control primers listed in Table S4C. Bands corresponding to the expected sizes are indicated by asterisks (\*).

```

265                               10       20       30       40       50       60       70       80       90      100
266                               |         |         |         |         |         |         |         |         |
267 M. rhizoxinica M1 (E5AV36)    FSQSDIVKVIAGNIGGAQALQAVLDLESMLGKRGFSRDDIAKMAGNIGGAQTLQAVLDLESAFRER--GFSQADIVKVIAGNNGGAQALYSVLD--VEPTLG
268 Mycetohabitans sp. M2 (MN891944) FSQSDIVKVIAGNIGGAQALQAVLDLESMLGKRGFSRDDIAKMAGNIGGAQTLQAVLDLESAFRER--GFSQADIVKVIAGNNGGAQALYSVLD--VEPTLG
269 Mycetohabitans sp. M4 (MN840538) -----LSPLERSKIEKH--YGGAAATLAFISNQHDELAQ--VLSRTDILKIASYDCAAQALQAVLD--CGPMLG
270 M. endofungorum M5 (MN891945)    FSQSDIVKVIAGNIGGAQALQAVLDLESMLGKRGFSRDDIAKMAGNIGGAQTLQAVLDLESAFRER--GFSQADIVKVIAGNNGGAQALYSVLD--VEPTLG
271 Mycetohabitans sp. M6 (MN840537) FSQSDIVKVIAGNIGGAQALQAVLDLESMLGKRGFSRDDIAKMAGNIGGAQTLQAVLDLESAFRER--GFSQADIVKVIAGNNGGAQALYSVLD--VEPTLG
272 Mycetohabitans sp. M7 (MN840539) -----
273 Mycetohabitans sp. M7 (MN840540) -----
274 Mycetohabitans sp. M8 (MN840541) -----
275 M. rhizoxinica M1 (E5AW45)    FSRADIVRIAGNGGGAQALYSVLDVEPTLGKRGFSQVDVVKIAG--GGAQALHTVLEIGPTLGER--GFSRGDIVTIAGNNGGAQALQAVLE--LEPTLR
276 Mycetohabitans sp. M2 (MN840542) FSRADIVRIAGNGGGAQALYSVLDVEPTLGKRGFSQVDVVKIAG--GGAQALHTVLEIGPTLGER--GFSRGDIVTIAGNNGGAQALQAVLE--LEPTLR
277 Mycetohabitans sp. M3 (MN840545) -----
278 Mycetohabitans sp. M6 (MN840543) FSRADIVRIAGNGGGAQALYSVLDVEPTLGKRGFSQVDVVKIAG--GGAQALHTVLEIGPTLGER--GFSRGDIVTIAGNNGGAQALQAVLE--LEPTLR
279 Mycetohabitans sp. M7 (MN840544) -----
280 M. rhizoxinica M1 (E5AW43) -----
281 Mycetohabitans sp. M2 (MN840547) -----
282 Mycetohabitans sp. M4 (MN840549) -----
283 Mycetohabitans sp. M6 (MN840546) -----
284 Mycetohabitans sp. M7 (MN840548) -----
285 AvrXa10 X. oryzae (Q56830) -----LTPDQVVVAIASNIGGQALETVQRLLPVLCQA-HGLTPDQVVVAIASHGGGKQALETVQR-LLPVLCQ
286 AvrBs3 X. euvesicatoria (P14727) -----LTPDQVVVAIASHGGGKQALETVQRLLPVLCQA-HGLTPDQVVVAIASNIGGQALETVQR-LLPVLCQ
287 Brg11 R. solanacearum (Q8XYE3) -----LTPDQVVVAIASNTGGKRALEAVCVQLPVLRAAPYRLSTEQVVVAIASNKGKQALEAVKADLLDLRGA
288
289                               110      120      130      140      150      160      170      180      190     200
290                               |         |         |         |         |         |         |         |         |
291 M. rhizoxinica M1 (E5AV36)    KRGFSRADIVKVIAGNTGGAQALHTVLDLEPALGKRGFS-----RIDIVKVIAGNNGGAQALHAVLD--LGPTLRE
292 Mycetohabitans sp. M2 (MN891944) KRGFSRADIVKVIAGNTGGAQALHTVLDLEPALGKRGFS-----RIDIVKVIAGNNGGAQALHAVLD--LGPTLRE
293 Mycetohabitans sp. M4 (MN840538) KRGFSRGDIVKVIAGNDGGAQALYSVLDVEPPLRERGF-----RADIVKVIAGNIGGAQALQAVLE--LEPTLRE
294 M. endofungorum M5 (MN891945)    KRGFSRADIVKVIAGNTGGAQALHTVLDLEPALGKRGFS-----RIDIVKVIAGNNGGAQALHAVLD--LGPTLRE
295 Mycetohabitans sp. M6 (MN840537) KRGFSRADIVKVIAGNTGGAQALHTVLDLEPALGKRGFS-----RIDIVKVIAGNNGGAQALHAVLD--LGPTLRE
296 Mycetohabitans sp. M7 (MN840539) -----VLE--LESTLRE
297 Mycetohabitans sp. M7 (MN840540) -----VLE--LESTLRE
298 Mycetohabitans sp. M8 (MN840541) -----
299 M. rhizoxinica M1 (E5AW45)    ERGFNQADIVKVIAGNGGGAQALQAVLDVEPALGKRGFSRVDIAKIAGGGAQALQAVLGLEPTLRKRGFHPTDIIKIAGNNGGAQALQAVLD--LELMLRE
300 Mycetohabitans sp. M2 (MN840542) ERGFNQADIVKVIAGNGGGAQALQAVLDVEPALGKRGFSRVDIAKIAGGGAQALQAVLGLEPTLRKRGFHPTDIIKIAGNNGGAQALQAVLD--LELMLRE
301 Mycetohabitans sp. M3 (MN840545) -----MSAMFMPQEGKQSANGLNLS-----PLERIKIEKHYGGSATLAFISN--QHDELAQ
302 Mycetohabitans sp. M6 (MN840543) ERGFNQADIVKVIAGNGGGAQALQAVLDVEPALGKRGFSRVDIAKIAGGGAQALQAVLGLEPTLRKRGFHPTDIIKIAGNNGGAQALQAVLD--LELMLRE
303 Mycetohabitans sp. M7 (MN840544) -----MPVTSVYQKDKPFGARLNLS-----PLERIKIEKHYGGSATLEFISN--QHDKLAQ
304 M. rhizoxinica M1 (E5AW43) -----
305 Mycetohabitans sp. M2 (MN840547) -----
306 Mycetohabitans sp. M4 (MN840549) -----
307 Mycetohabitans sp. M6 (MN840546) -----
308 Mycetohabitans sp. M7 (MN840548) -----
309 AvrXa10 X. oryzae (Q56830)    AHGLTPDQVVVAIASNIGGKQALATVQR-LLPVLCQDHG-----LTPDQVVVAIASHGGGKQALETVQR-LLPVLCQD
310 AvrBs3 X. euvesicatoria (P14727) AHGLTPDQVVVAIASNIGGKQALETVQR-LLPVLCQAHG-----LTPDQVVVAIASNIGGKQALETVQR-LLPVLCQA
311 Brg11 R. solanacearum (Q8XYE3) PYVLDTEQVVVAIASHNGGKQALEAVKADLLDLRGA-----LSTEQVVVAIASHNGGKQALEAVKADLLDLRGA
312

```

```

313
314
315
316 M. rhizoxinica M1 (E5AV36) CGFSQATIAKIAGNIGGAQALQMVLD--LGPALGKRGFSQATIAKIAGN-----IGGAQALQTVLD--LEPA
317 Mycetohabitans sp. M2 (MN891944) CGFSQATIAKIAGNIGGAQALQMVLD--LGPALGKRGFSQATIAKIAGN-----IGGAQALQTVLD--LEPA
318 Mycetohabitans sp. M4 (MN840538) RGFSQVDIVKIASNDGGAQALYSVLD--VEPTFRERGFSSRADIVKTIAGNNGGAQALHTVLDVESALSSEHGFCRGTVKIAGNIGGAQALQAVLE--LEPT
319 M. endofungorum M5 (MN891945) CGFSQATIAKIAGNIGGAQALQMVLD--LGPALGKRGFSQATIAKIAGN-----IGGAQALQTVLD--LEPA
320 Mycetohabitans sp. M6 (MN840537) CGFSQATIAKIAGNIGGAQALQMVLD--LGPALGKRGFSQATIAKIAGN-----IGGAQALQTVLD--LEPA
321 Mycetohabitans sp. M7 (MN840539) RSFNRADIVRIAGNGGGAQSLYSVRD--AGPTLGRRGFSRVDIVKIAG-----GGAQALHTVLE--LEPT
322 Mycetohabitans sp. M7 (MN840540) RSFNRADIVRIAGNGGGAQSLYSVRD--AGPTLGRRGFSRVDIVKIAG-----GGAQALHTVLE--LEPT
323 Mycetohabitans sp. M8 (MN840541) -----MAGNI-----GGAQALQAVLE--LEPA
324 M. rhizoxinica M1 (E5AW45) RGFSQADIVKMASNIGGAQALQAVLN--LEPALCERGFSPDIVKMAGNSGGAQALQAVLDLELAFRERGFSDIVKMASNIGGAQALQAVLE--LEPA
325 Mycetohabitans sp. M2 (MN840542) RGFSQADIVKMASNIGGAQALQAVLN--LEPALCERGFSPDIVKMAGNSGGAQALQAVLDLELAFRERGFSDIVKMASNIGGAQALQAVLE--LEPA
326 Mycetohabitans sp. M3 (MN840545) -VLSRADILKIASYDCAAQALQAVLD--CGPMLGKRGFSRADIVKIAGNG-----GGAQALQAVLE--LEPT
327 Mycetohabitans sp. M6 (MN840543) RGFSQADIVKMASNIGGAQALQAVLN--LEPALCERGFSPDIVKMAGNSGGAQALQAVLDLELAFRERGFSDIVKMASNIGGAQALQAVLE--LEPA
328 Mycetohabitans sp. M7 (MN840544) -VLSRADILKIASYDCAAQALQAVLD--CGPMLGKRGFSRADIVKIAGNG-----GGAQALQAVLE--LEPT
329 M. rhizoxinica M1 (E5AW43) -----FARDIIKITGNG-----GGAQALKAVVV--HGPT
330 Mycetohabitans sp. M2 (MN840547) -----FARDIIKITGNG-----GGAQALKAVVV--HGPT
331 Mycetohabitans sp. M4 (MN840549) -----FARDIIKITGNG-----GGAQALKAVVV--HGPT
332 Mycetohabitans sp. M6 (MN840546) -----FARDIIKITGNG-----GGAQALKAVVV--HGPT
333 Mycetohabitans sp. M7 (MN840548) -----FARDIIKITGNG-----GGAQALKAVVV--HGPT
334 AvrXa10 X. oryzae (Q56830) HGLTPDQVVAIASNIGGKQALETVQR--LLPVLCDHGLTPDQVVAIASNI-----GGKQALETVQR--LLPVL
335 AvrBs3 X. euvesicatoria (P14727) HGLTPQVVAIASNIGGKQALETVQA--LLPVLCAHGLTPQVVAIASNI-----GGKQALETVQA--LLPVL
336 Brg11 R. solanacearum (Q8XYE3) YALSTEQVVAIASHNIGGKQALEAVKAHLLDLRGVPYALSTEQVVAIASHN-----GGKQALEAVKAQLLDLR
337
338
339
340 M. rhizoxinica M1 (E5AV36) LCERGFSAITAKMAGNNGGAQALQ-----TVLDLEPAL
341 Mycetohabitans sp. M2 (MN891944) LCERGFSAITAKMAGNNGGAQALQ-----TVLDLEPAL
342 Mycetohabitans sp. M4 (MN840538) LRERGFSSRADILRIAGNGGGAQALQ-----AVLELEPTL
343 M. endofungorum M5 (MN891945) LCERGFSAITAKMAGNNGGAQALQ-----TVLDLEPAL
344 Mycetohabitans sp. M6 (MN840537) LCERGFSAITAKMAGNNGGAQALQ-----TVLDLEPAL
345 Mycetohabitans sp. M7 (MN840539) LRKRGFNPTDIVRMAGNDGGAQALQ-----AVFELEPAF
346 Mycetohabitans sp. M7 (MN840540) LRKRGFNPTDIVKIAGNDGGAQALQ-----AVLELEPAL
347 Mycetohabitans sp. M8 (MN840541) FRERGFSPDIVKMAGNIGGAQALQ-----AVLELEPML
348 M. rhizoxinica M1 (E5AW45) LHERGFSAIVKMAGNSGGAQALQAVLDLELVFRERGFSPDIVEMAGNIGGAQALHTVLDLELAFRERGVQRADIVKIVGNNGGAQALQAVFELEPTL
349 Mycetohabitans sp. M2 (MN840542) LHERGFSAIVKMAGNSGGAQALQAVLDLELVFRERGFSPDIVEMAGNIGGAQALHTVLDLELAFRERGVQRADIVKIVGNNGGAQALQAVFELEPTL
350 Mycetohabitans sp. M3 (MN840545) FRERGFSSRADIVKIASNNGGAQALQALQ-----AVLELEPTL
351 Mycetohabitans sp. M6 (MN840543) LHERGFSAIVKMAGNSGGAQALQAVLDLELVFRERGFSPDIVEMAGNIGGAQALHTVLDLELAFRERGVQRADIVKIVGNNGGAQALQAVFELEPTL
352 Mycetohabitans sp. M7 (MN840544) FRERGFSSRADIVKIASNNGGAQALQALQ-----AVLELEPTL
353 M. rhizoxinica M1 (E5AW43) LNECGFSQADIVRIADNIGGAQALK-----AVLEHGPTL
354 Mycetohabitans sp. M2 (MN840547) LNECGFSQADIVRIADNIGGAQALK-----AVLEHGPTL
355 Mycetohabitans sp. M4 (MN840549) -----VLDYEQVF
356 Mycetohabitans sp. M6 (MN840546) LNECGFSQADIVRIADNIGGAQALK-----AVLEHGPTL
357 Mycetohabitans sp. M7 (MN840548) -----VLDYEQVF
358 AvrXa10 X. oryzae (Q56830) CQDHGLTPDQVVAIASNNGGKQALETV-----QRLLPVLC
359 AvrBs3 X. euvesicatoria (P14727) CQAHGLTPQVVAIASNIGGKQALETV-----QALLPVLC
360 Brg11 R. solanacearum (Q8XYE3) GAPPYALSTAQVVAIASNNGGKQALEGIG-----EQLLKLR
361
362

```



```

363                                     410       420       430       440       450       460       470       480       490       500
364                                     .....|.....|.....|.....|.....|.....|.....|.....|.....|.....|.....|.....|.....|.....|.....|.....|
365 M. rhizoxinica M1 (E5AV36)          RKRDFRQADI I I K I A G N D G -----G A Q A L Q A V --I E H G P T L R Q H G F N L A D I V K M A G N I G G A Q A L Q A V L D L K P V L D
366 Mycetohabitans sp. M2 (MN891944) RKRDFRQADI I I K I A G N D G -----G A Q A L Q A V --I E H G P T L R Q H G F N L A N I V K M A G N I G G A Q A L Q A V L D L K P V L D
367 Mycetohabitans sp. M4 (MN840538) RERSFNRADIVRIAGNGGGAQALYSVRDAGPTL GKRGF S Q V D I V K I A G G G A Q A L H T V --L E L E P T L R K R G F N P T D I V R M A G N D G G A Q A L Q A V L E L E P A F R
368 M. endofungorum M5 (MN891945)     RKRDFRQADI I I K I A G N D G -----G A Q A L Q A V --I E H G P T L R Q H G F N L A D I V K M A G N I G G A Q A L Q A V L D L K P V L D
369 Mycetohabitans sp. M6 (MN840537) RKRDFRQADI I I K I A G N D G -----G A Q A L Q A V --I E H G P T L R Q H G F N L A D I V K M A G N I G G A Q A L Q A V L D L K P V L D
370 Mycetohabitans sp. M7 (MN840539) RERSFSQPDIVKMA G N N G -----G A Q A L Q A V --L E L D P A F R E R G F N P T D I V K I A G N N G G A Q A L Q A V L E L E P A L R
371 Mycetohabitans sp. M7 (MN840540) RERGF S Q P D I V K M A G N D G -----G A Q A L Q A G --L E L D P A F R E R G F N P T D I V K I A G N I G G A Q A L Q A V L E L E P A F R
372 Mycetohabitans sp. M8 (MN840541) RECDFRQADIVKIA G N G G -----S A Q A L K A V --L E H G P T L R Q R G F S R A D I V K I A A N G G G A Q A L Q A V L K -----
373 M. rhizoxinica M1 (E5AW45)          RERGFNQATIVKIAANGGGAQALYSVLDVEPTL D K R G F S R V D I V K I A G G G A Q A L H T A --F E L E P T L R K R G F N P T D I V K I A G N K G G A Q A L Q A V L E L E P A L R
374 Mycetohabitans sp. M2 (MN840542) RERGFNQATIVKIAANGGGAQALYSVLDVEPTL D K R G F S R V D I V K I A G G G A Q A L H T A --F E L E P T L R K R G F N P T D I V K I A G N K G G A Q A L Q A V L E L E P A L R
375 Mycetohabitans sp. M3 (MN840545) REHGF S R A D I V R I A G N G G -----G A Q A L Y S V --L D V G L T L G K R S F S R A D I V K M A R N D G G A Q A L H T V L K L E P T L G
376 Mycetohabitans sp. M6 (MN840543) RERGFNQATIVKIAANGGGAQALYSVLDVEPTL D K R G F S R V D I V K I A G G G A Q A L H T A --F E L E P T L R K R G F N P T D I V K I A G N K G G A Q A L Q A V L E L E P A L R
377 Mycetohabitans sp. M7 (MN840544) REHGF S R A D I V R I A G N G G -----G A Q A L Y S V --L D V G P T L G K R G F S R A D I V K I A G N G G G A Q A L H T V F K L E P T L G
378 M. rhizoxinica M1 (E5AW43)          NERDYSGADIVKIA G N G G -----G A R A L K A V --V M H G P T L C E S G Y S G A D I V K I A S N G G G A Q A L E A V A M -----
379 Mycetohabitans sp. M2 (MN840547) NERDYSGADIVKIA G N G G -----G A R A L K A V --V M H G P T L C E S G Y S G A D I V K I A S N G G G A Q A L E A V A M -----
380 Mycetohabitans sp. M4 (MN840549) RQRGFARVDI I K I T G N D G -----G A Q A L K A V --I V H G S T L N E R G Y S G A N I V K I A G N G G G A R A I E A V M -----
381 Mycetohabitans sp. M6 (MN840546) NERDYSGADIVKIA G N G G -----G A R A L K A V --V M H G P T L C E S G Y S G A D I V K I A S N G G G A Q A L E A V A M -----
382 Mycetohabitans sp. M7 (MN840548) RQRGFARVDI I K I T G N D G -----G A Q A L K A V --V V H G P T L N E R G Y S G A D I V K I A G N G G G A W A L K A V M -----
383 AvrXa10 X. oryzae (Q56830)          QTHGLTPDQVVAI A N H D G -----G K Q A L E T V --Q R L L P V L C Q D H G L T P D Q V V A I A S N I G G K Q A L A T V Q R --L L P V L
384 AvrBs3 X. euvesicatoria (P14727) QAHGLTPEQVVAI A S H D G -----G K Q A L E T V --Q R L L P V L C Q A H G L T P E Q V V A I A S H D G G K Q A L E T V Q R --L L P V L
385 Brg11 R. solanacearum (Q8XYE3)     APYGLSTEQVVAI A S H D G -----G K Q A L E A V G A Q L V A L R A A P Y A L S T E Q V V A I A S N K G G K Q A L E A V K A Q L L E L R
386
387                                     510       520       530       540       550       560       570       580       590       600
388                                     .....|.....|.....|.....|.....|.....|.....|.....|.....|.....|.....|.....|.....|.....|.....|.....|
389 M. rhizoxinica M1 (E5AV36)          E H G F -----S Q P D I V K M A G N I G G A Q A L Q A V --L S L G P A L R E R G F S Q P D I V K I A G N T G G A Q A L Q A V L D L E L T L
390 Mycetohabitans sp. M2 (MN891944) E H G F -----S Q P D I V K M A G N I G G A Q A L Q A V --L S L G P A L R E R G F S Q P D I V K I A G N T G G A Q A L Q A V L D L E L T L
391 Mycetohabitans sp. M4 (MN840538) E R G F -----S Q P D I V K M A G N N G G A Q A L Q A G --L E L E P A F R E R G F N P T D M V K I A G N N G G A Q A L Q A V L E L E P A L
392 M. endofungorum M5 (MN891945)     E H G F -----S Q P D I V K M A G N I G G A Q A L Q A V --L S L G P A L R E R G F S Q P D I V K I A G N T G G A Q A L Q A V L D L E L T L
393 Mycetohabitans sp. M6 (MN840537) E H G F -----S Q P D I V K M A G N I G G A Q A L Q A V --L S L G P A L R E R G F S Q P D I V K I A G N T G G A Q A L Q A V L D L E L T L
394 Mycetohabitans sp. M7 (MN840539) E R G F -----S Q P D I V K M A S N S G G A Q A L Q A G --L E L E P -----
395 Mycetohabitans sp. M7 (MN840540) E R G F -----S Q P D I V K M A G N S G G A Q A L Q A G --L E L E P A F R E R G F N P T D I V K I A G N N G G A Q A L Q A V L E L E P A L
396 Mycetohabitans sp. M8 (MN840541) -----
397 M. rhizoxinica M1 (E5AW45)          E R G F N Q A T I V K M A G N A G G A Q A L Y S V L D V E P A L R E R G F S Q P E I V K I A G N I G G A Q A L H T V --L E L E P T L H K R G F N P T D I V K I A G N S G G A Q A L Q A V L E L E P A F
398 Mycetohabitans sp. M2 (MN840542) E R G F N Q A T I V K M A G N A G G A Q A L Y S V L D V E P A L R E R G F S Q P E I V K I A G N I G G A Q A L H T V --L E L E P T L H K R G F N P T D I V K I A G N S G G A Q A L Q A V L E L E P A F
399 Mycetohabitans sp. M3 (MN840545) E R G F -----S R G D I V K M A G N I G G A Q A L K A V --L E -----
400 Mycetohabitans sp. M6 (MN840543) E R G F N Q A T I V K M A G N A G G A Q A L Y S V L D V E P A L R E R G F S Q P E I V K I A G N I G G A Q A L H T V --L E L E P T L H K R G F N P T D I V K I A G N S G G A Q A L Q A V L E L E P A F
401 Mycetohabitans sp. M7 (MN840544) E R G F -----S R G D I V K M A G N I G G A Q A L Q A V --L E L E P A F H E R S F C Q P D I V K M A G N I G G A Q A L Q A V L E L E P A F
402 M. rhizoxinica M1 (E5AW43)          -----
403 Mycetohabitans sp. M2 (MN840547) -----
404 Mycetohabitans sp. M4 (MN840549) -----
405 Mycetohabitans sp. M6 (MN840546) -----
406 Mycetohabitans sp. M7 (MN840548) -----
407 AvrXa10 X. oryzae (Q56830)          C Q A H G -----L T P D Q V V A I A S H D G G K Q A L E T V --Q R L L P V L C Q D H G L T P D Q V V A I A S N N G G K Q A L E T V Q R L L P V L
408 AvrBs3 X. euvesicatoria (P14727) C Q A H G -----L T P Q Q V V A I A S N G G K Q A L E T V --Q R L L P V L C Q A H G L T P E Q V V A I A S N S G G K Q A L E T V Q A L L P V L
409 Brg11 R. solanacearum (Q8XYE3)     G A P Y A -----L S T A Q V V A I A S H D G G N Q A L E A V G T Q L V A L R A A P Y A L S T E Q V V A I A S H D G G K Q A L E A V G A Q L V A L
410
411

```

```

412                               610       620       630       640       650       660       670       680       690       700
413   .....|.....|.....|.....|.....|.....|.....|.....|.....|.....|.....|.....|.....|.....|
414   M. rhizoxinica M1 (E5AV36)   VEHGFSQPDIVRITGNRGGAAQALQAVLALELTLRERGFSPQDIVKVIAGNSGGAQALQAVLDLELTFRER--GFSQADIVKVIAGNDGGTQALHAVLDLERM
415   Mycetohabitans sp. M2 (MN891944) VEHGFSQPDIVRITGNRGGAAQALQAVLALELTLRERGFSPQDIVKVIAGNSGGAQALQAVLDLELTFRER--GFSQADIVKVIAGNDGGTQALHAVLDLERM
416   Mycetohabitans sp. M4 (MN840538) RERGFSPQDIVKMASNSGGAQALQVVLLELEPTLRERDFRQADIVKVIAGNSGGAQALNAVILKLGPTLRQR--GFSRADIVKIAAN-----
417   M. endofungorum M5 (MN891945)   VEHGFSQPDIVRITGNRGGAAQALQAVLALELTLRERGFSPQDIVKVIAGNSGGAQALQAVLDLELTFRER--GFSQADIVKVIAGNDGGTQALHAVLDLERM
418   Mycetohabitans sp. M6 (MN840537) VEHGFSQPDIVRITGNRGGAAQALQAVLALELTLRERGFSPQDIVKVIAGNSGGAQALQAVLDLELTFRER--GFSQADIVKVIAGNDGGTQALHAVLDLERM
419   Mycetohabitans sp. M7 (MN840539) -----TLRERDFRQADIVKMASNSGGAQALNAVILKLGPTLRQR--GFSRADIVKIAAN-----
420   Mycetohabitans sp. M7 (MN840540) RERSFSQPDIVKMASNSGGAQALQAVLVLEPTLRERDFRQADIVKMASNSGGAQALNAVILKLGPTLRQR--GFSRADIVKIAAN-----
421   Mycetohabitans sp. M8 (MN840541) -----
422   M. rhizoxinica M1 (E5AW45)     RERGFSPQDIVKMASNIGGAQALQAVLELEPALRERGFSPQDIVEMAGNIGGAQALQAVLELEPAFRER--GFSQSDIVKVIAGNIGGAQALQAVLELEPT
423   Mycetohabitans sp. M2 (MN840542) RERGFSPQDIVKMASNIGGAQALQAVLELEPALRERGFSPQDIVEMAGNIGGAQALQAVLELEPAFRER--GFSQSDIVKVIAGNIGGAQALQAVLELEPT
424   Mycetohabitans sp. M3 (MN840545) -----
425   Mycetohabitans sp. M6 (MN840543) RERGFSPQDIVKMASNIGGAQALQAVLELEPALRERGFSPQDIVEMAGNIGGAQALQAVLELEPAFRER--GFSQSDIVKVIAGNIGGAQALQAVLELEPT
426   Mycetohabitans sp. M7 (MN840544) RERGFSRGDIVKMAGNIGGAQALQAGLELEPAFRERGFSRGDIVKMAGNIGGAQALQAVLELEPAFREH--GFSQPDIVKVIAGNIGGAQALQAVLELEPA
427   M. rhizoxinica M1 (E5AW43) -----
428   Mycetohabitans sp. M2 (MN840547) -----
429   Mycetohabitans sp. M4 (MN840549) -----
430   Mycetohabitans sp. M6 (MN840546) -----
431   Mycetohabitans sp. M7 (MN840548) -----
432   AvrXal0 X. oryzae (Q56830)    CQD-----HGLTPAQVVAIANHGGKQALETVQRLLPVLCQD-HGLTPVQVVAIASN-----
433   AvrBs3 X. euvesicatoria (P14727) CQA-----HGLTPAQVVAIASNSGKQALETVQRLLPVLCQA-HGLTPAQVVAIASH-----
434   Brg11 R. solanacearum (Q8XYE3) RAAP-----YALNTEQVVAIASSHGGKQALEAVRALFPDLRAAPYALSTAQLVAIASN-----
435
436                               710       720       730       740       750       760       770       780       790       800
437   .....|.....|.....|.....|.....|.....|.....|.....|.....|.....|.....|.....|.....|.....|
438   M. rhizoxinica M1 (E5AV36)   LGERGFSTRADIVNVAGNNGGAQALKAVLEHEATLNERGFSTRADIVKVIAGNSGGAQALKAVLEHEATLDER--GFSRADIVRVIAGNGGGAQALKAVLEHGP
439   Mycetohabitans sp. M2 (MN891944) LGERGFSTRADIVNVAGNNGGAQALKAVLEHEATLNERGFSTRADIVKVIAGNSGGAQALKAVLEHEATLDER--GFSRADIVRVIAGNGGGAQALKAVLEHGP
440   Mycetohabitans sp. M4 (MN840538) -----GGGAQALQAVLKHGPTLGER--GFTLTDIVEMAGNNGGAQALKAVLEHGS
441   M. endofungorum M5 (MN891945)   LGERGFSTRADIVNVAGNNGGAQALKAVLEHEATLNERGFSTRADIVKVIAGNSGGAQALKAVLEHEATLDER--GFSRADIVRVIAGNGGGAQALKAVLEHGP
442   Mycetohabitans sp. M6 (MN840537) LGERGFSTRADIVNVAGNNGGAQALKAVLEHEATLNERGFSTRADIVKVIAGNSGGAQALKAVLEHEATLDER--GFSRADIVRVIAGNGGGAQALKAVLEHGP
443   Mycetohabitans sp. M7 (MN840539) -----GGGAQALQAVLKHGPTLGER--GFTLTDIVKMASNNGGAQALKAVLEHGP
444   Mycetohabitans sp. M7 (MN840540) -----GGGAQALQAVLKHGPTLGER--GFTLTDIVKMASNNGGAQALKAVLEHGP
445   Mycetohabitans sp. M8 (MN840541) -----HGPTLDER--GFTLTDIVKMAGNVGGAQALKAVLEHGP
446   M. rhizoxinica M1 (E5AW45)     LRESDFRQADIVNVIAGNDGSTQALKAVIEHGPRLRQRGFNRASIVKVIAGNSGGAQALQAVLKHGPTLDER--GFNLTNIVKVIAGNGGGAQALKAVIEHGP
447   Mycetohabitans sp. M2 (MN840542) LRESDFRQADIVNVIAGNDGSTQALKAVIEHGPRLRQRGFNRASIVKVIAGNSGGAQALQAVLKHGPTLDER--GFNLTNIVKVIAGNGGGAQALKAVIEHGP
448   Mycetohabitans sp. M3 (MN840545) -----HGPTLDER--GFTLTDIVKMAGNIGGAQALKAVLEHGP
449   Mycetohabitans sp. M6 (MN840543) LRESDFRQADIVNVIAGNDGSTQALKAVIEHGPRLRQRGFNRASIVKVIAGNSGGAQALQAVLKHGPTLDER--GFNLTNIVKVIAGNGGGAQALKAVIEHGP
450   Mycetohabitans sp. M7 (MN840544) FRERGFSPSINVIKVIAGNIGGAQALQAVLELEPMLRECDFRQDIVKMASGSGGAQALNAVILKHGPTLRQR--GFSQADIVKVIAGNSGGAQALKAVIEHGP
451   M. rhizoxinica M1 (E5AW43) -----HGSTLCER--GYCRTDIAKIAGNGGGAQALKAVIEMHGP
452   Mycetohabitans sp. M2 (MN840547) -----HGSTLCER--GYCRTDIAKIAGNGGGAQALKAVIEMHGP
453   Mycetohabitans sp. M4 (MN840549) -----HGPTLGER--GYSRTDIVKIIDNNGGAQALKAVFEHGP
454   Mycetohabitans sp. M6 (MN840546) -----HGSTLCER--GYCRTDIAKIAGNGGGAQALKAVIEMHGP
455   Mycetohabitans sp. M7 (MN840548) -----HGPTLGER--GYSRTDIVKIADNNGGAQALKAVFEHGP
456   AvrXal0 X. oryzae (Q56830) -----SGGKQALETVQRLLPVLCQD-HGLTPVQVVAIASNSGKQALATVQRLLP
457   AvrBs3 X. euvesicatoria (P14727) -----DGGKQALETVQRLLPVLCQA-HGLTPAQVVAIASHGGKQALETVQRLLP
458   Brg11 R. solanacearum (Q8XYE3) -----PGGKQALEAVRALFRELRAAPYALSTEQVVAIASNSHGGKQALEAVRALFR

```

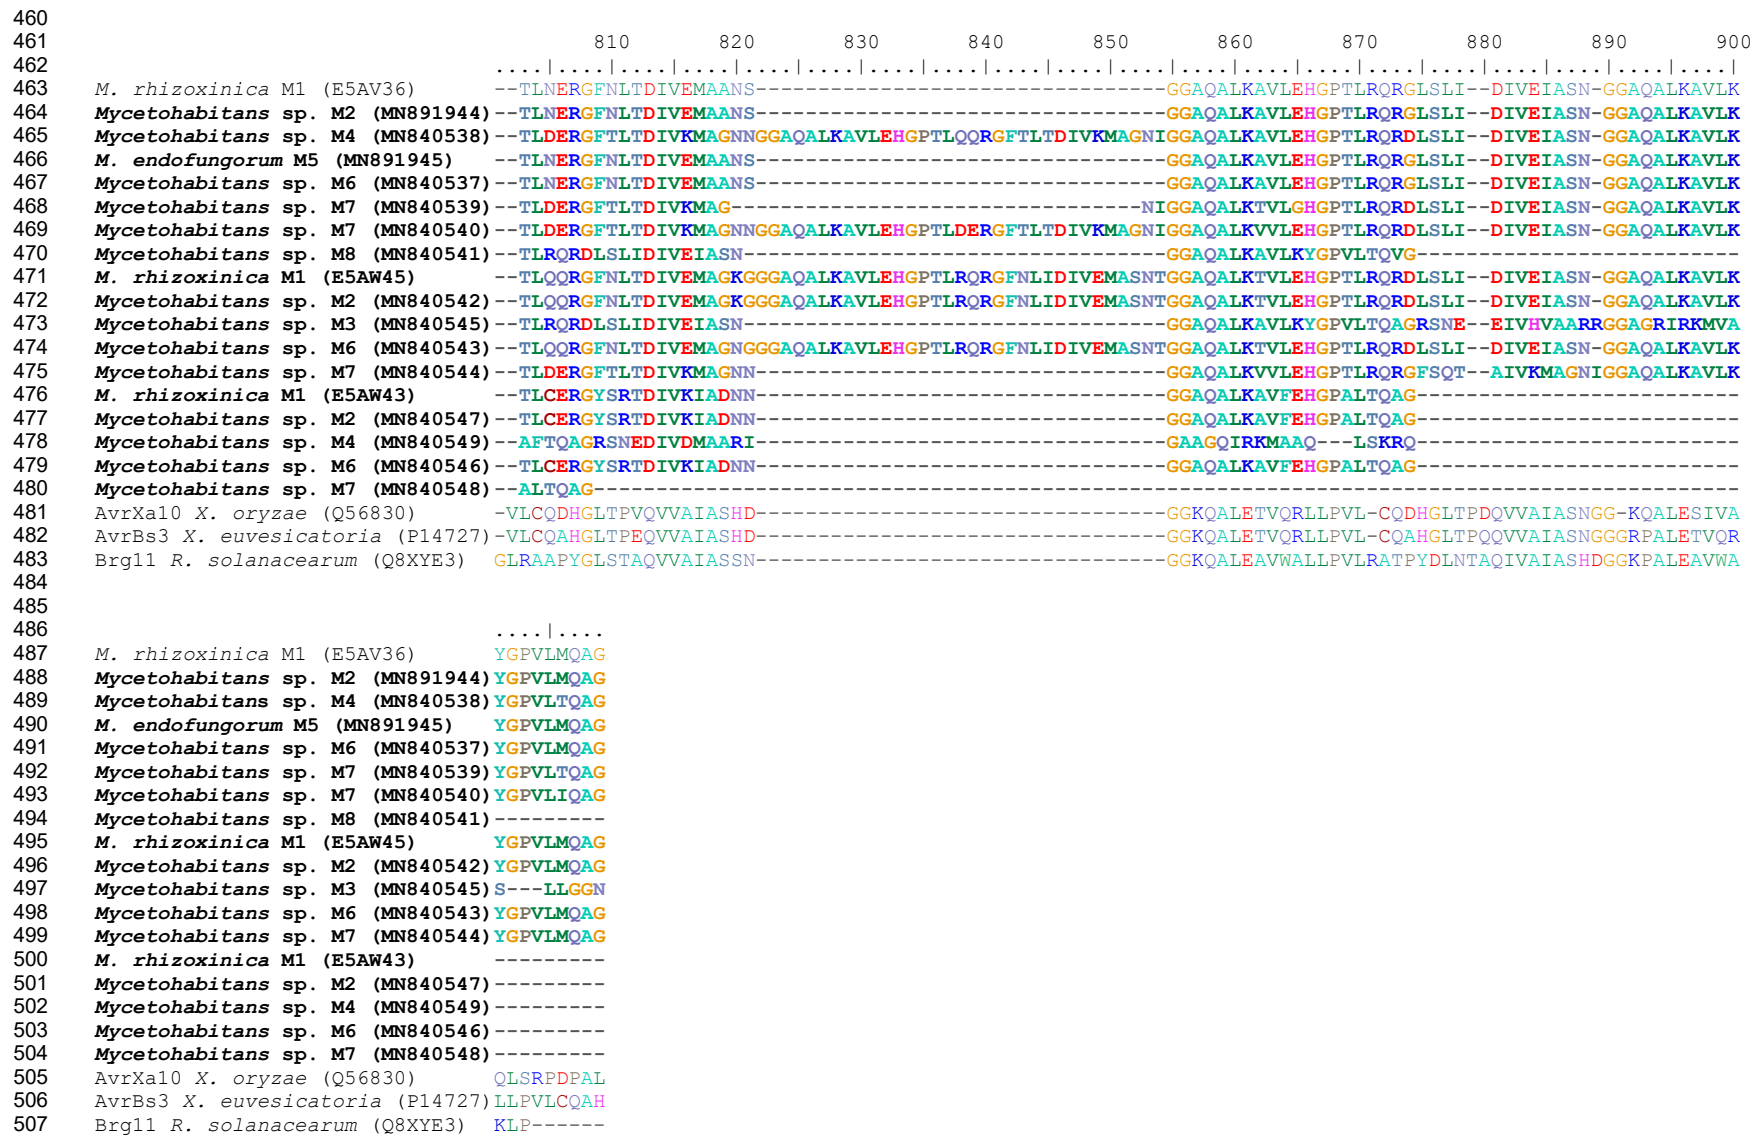

508  
509 **Fig. S3.** Alignment of predicted TAL effector proteins from endofungal *Mycetohabitans* species (MTAL) and plant pathogenic *R. solanacearum* and *Xanthomonas*  
510 species. The core repeats of each protein were used for alignment (1). Sequences identified in this study are highlighted in bold (Table S3). GenBank accession  
511 numbers are indicated in brackets.  
512

**Table S1.** Fungal strains used in this study that harbor bacterial endosymbionts (2).

| <b>Taxon</b>                                                                  | <b>Strain designation</b> | <b>Origin</b>                                                                     | <b>Bacterial endosymbiont (isolate)</b>         |
|-------------------------------------------------------------------------------|---------------------------|-----------------------------------------------------------------------------------|-------------------------------------------------|
| <i>Rhizopus microsporus</i> van Tieghem                                       | ATCC 62417                | Rice seedlings, Japan                                                             | <i>Mycetohabitans rhizoxinica</i> HKI-454 (M1)  |
| <i>Rhizopus</i> sp. strain F-1360                                             | ATCC 20577                | Soil, Japan                                                                       | <i>Mycetohabitans</i> sp. strain HKI-512 (M2)   |
| <i>Rhizopus microsporus</i> Tieghem var. <i>microsporus</i>                   | CBS 111563                | Sufu starter culture, rice wine tablet, Vietnam                                   | <i>Mycetohabitans</i> sp. strain HKI-455 (M3)   |
| <i>Rhizopus microsporus</i> Tieghem var. <i>microsporus</i>                   | CBS 699.68                | Soil, Ukraine                                                                     | <i>Mycetohabitans</i> sp. strain HKI-402 (M4)   |
| <i>Rhizopus microsporus</i> Tieghem                                           | CBS 112285                | Ground nuts, Mozambique                                                           | <i>Mycetohabitans endofungorum</i> HKI-456 (M5) |
| <i>Rhizopus microsporus</i> var. <i>chinensis</i> (Saito) Schipper & Stalpers | CBS 261.28                | Not specified, USA                                                                | <i>Mycetohabitans</i> sp. strain HKI-513 (M6)   |
| <i>Rhizopus microsporus</i> Tieghem var. <i>microsporus</i>                   | CBS 700.68                | Forest soil, Georgia                                                              | <i>Mycetohabitans</i> sp. strain HKI-403 (M7)   |
| <i>Rhizopus microsporus</i> Tieghem var. <i>microsporus</i>                   | CBS 308.87                | Man, from deep necrotic tissue within the hand following a spider bite, Australia | <i>Mycetohabitans</i> sp. strain HKI-404 (M8)   |

515 **Table S2.** Predicted nuclear localization sequences (NLS) within AWR proteins from endofungal *Mycetohabitans* and plant-associated *Burkholderia* species, and  
 516 plant pathogenic *R. solanacearum* using (A) NucPred prediction software (3) and (B) cNLS Mapper (4). GenBank accession numbers are given in brackets.

| <b>A</b> | <b>Species<br/>(Gen. Bank Acc. No)</b>               | <b>NLS motif<br/>(monopartite)</b> | <b>Position in<br/>protein<sup>1</sup></b> | <b>NucPred<br/>Score<sup>2</sup></b> | <b>Specificity<sup>3</sup></b> | <b>Sensitivity<br/>(coverage)<sup>4</sup></b> |
|----------|------------------------------------------------------|------------------------------------|--------------------------------------------|--------------------------------------|--------------------------------|-----------------------------------------------|
|          | <i>Ralstonia solanacearum</i><br>(BAH47286.1) AWR1   | GATRRRRNSG                         | 38 – 45                                    | 0.75                                 | 0.81                           | 0.44                                          |
|          | <i>Paraburkholderia graminis</i><br>(WP 006047106.1) | TRRRM                              | 36 – 40                                    | 0.62                                 | 0.71                           | 0.53                                          |
|          | <i>Burkholderia glumae</i><br>(WP 012733093.1)       | QARRRQG                            | 78 – 84                                    | 0.55                                 | 0.70                           | 0.62                                          |
|          | <i>Burkholderia</i> sp. CCGE1003<br>(ADN59567.1)     | DPQRRRRFVDD                        | 693 – 693                                  | 0.62                                 | 0.71                           | 0.53                                          |
|          | <i>Mycetohabitans rhizoxinica</i><br>HKI-454 (M1)    | KRSRKRKATV                         | 577 – 586                                  | 0.68                                 | 0.71                           | 0.53                                          |
|          | <i>Mycetohabitans</i> sp. strain<br>HKI-512 (M2)     | KRSRKRKATV                         | 577 – 586                                  | 0.68                                 | 0.71                           | 0.53                                          |
|          | <i>Mycetohabitans</i> sp. strain<br>HKI-455 (M3)     | KRSRKRKATV                         | 572 – 581                                  | 0.75                                 | 0.81                           | 0.44                                          |
|          | <i>Mycetohabitans</i> sp. strain<br>HKI-402 (M4)     | KRSRKRKATV                         | 572 – 581                                  | 0.75                                 | 0.81                           | 0.44                                          |
|          | <i>Mycetohabitans endofungorum</i><br>HKI-456 (M5)   | KRSRKRKATV                         | 572 – 581                                  | 0.68                                 | 0.71                           | 0.53                                          |
|          | <i>Mycetohabitans</i> sp. strain<br>HKI-513 (M6)     | KRSRKRKATV                         | 577 – 586                                  | 0.69                                 | 0.71                           | 0.53                                          |
|          | <i>Mycetohabitans</i> sp. strain<br>HKI-403 (M7)     | KRSRKRKATV                         | 572 – 581                                  | 0.73                                 | 0.81                           | 0.44                                          |
|          | <i>Mycetohabitans</i> sp. strain<br>HKI-404 (M8)     | KRSRERKATV                         | 559 – 568                                  | 0.62                                 | 0.71                           | 0.53                                          |

517

| B                              | Species<br>(Gen. Bank Acc. No)                               | NLS motif<br>(monopartite) | Position in<br>protein <sup>1</sup> | cNLS<br>Score <sup>5</sup> | NLS motif<br>(bipartite)       | Position in<br>protein <sup>1</sup> | cNLS<br>Score <sup>5</sup> |
|--------------------------------|--------------------------------------------------------------|----------------------------|-------------------------------------|----------------------------|--------------------------------|-------------------------------------|----------------------------|
|                                | <i>Ralstonia solanacearum</i><br>(BAH47286.1) AWR1           | N/A                        | N/A                                 | N/A                        | N/A                            | N/A                                 | N/A                        |
|                                | <i>Paraburkholderia graminis</i><br>(WP 006047106.1)         | N/A                        | N/A                                 | N/A                        | N/A                            | N/A                                 | N/A                        |
|                                | <i>Burkholderia glumae</i><br>(WP 012733093.1)               | N/A                        | N/A                                 | N/A                        | N/A                            | N/A                                 | N/A                        |
|                                | <i>Burkholderia</i> sp. CCGE1003<br>(ADN59567.1)             | N/A                        | N/A                                 | N/A                        | N/A                            | N/A                                 | N/A                        |
|                                | <i>Mycetohabitans rhizoxinica</i><br>HKI-454 (M1)            | RSRKRKATVQ                 | 578 – 587                           | 13                         | KATKATKATKLPKLPKLPKLPKLPKLP    | 1083 – 1096                         | 5.5                        |
| KATKATKATKLPKLPKLPKLPKLPKLPKLP |                                                              |                            |                                     |                            | 1083 – 1112                    | 6.1                                 |                            |
| KATKATKLPKLPKLPKLPKLPKLPKLPKG  |                                                              |                            |                                     |                            | 1086 – 1114                    | 5.6                                 |                            |
|                                | <i>Mycetohabitans</i> sp. strain<br>HKI-512 (M2)             | RSRKRKATVQ                 | 578 – 587                           | 13                         | FMGKPVAATKATKLPKLPKLPKLPKLPKLP | 1061 – 1090                         | 5.5                        |
| KATKLPKLPKLPKLPKLPKLPKLPKG     |                                                              |                            |                                     |                            | 1070 – 1095                    | 5.5                                 |                            |
|                                | <i>Mycetohabitans</i> sp. strain<br>HKI-455 (M3)             | RSRKRKATVQ                 | 573 – 582                           | 13                         | N/A                            | N/A                                 | N/A                        |
|                                | <i>Mycetohabitans</i> sp. strain<br>HKI-402 (M4)             | RSRKRKATVQ                 | 573 – 582                           | 13                         | N/A                            | N/A                                 | N/A                        |
|                                | <i>Mycetohabitans</i><br><i>endofungorum</i><br>HKI-456 (M5) | RSRKRKATVQ                 | 573 – 582                           | 13                         | N/A                            | N/A                                 | N/A                        |
|                                | <i>Mycetohabitans</i> sp. strain<br>HKI-513 (M6)             | RSRKRKATVQ                 | 578 – 587                           | 13                         | KATKATKATKLPKLPKLPKLPKLPKLP    | 1070 – 1096                         | 5.5                        |
| KATKATKATKLPKLPKLPKLPKLPKLPKG  |                                                              |                            |                                     |                            | 1070 – 1098                    | 5.5                                 |                            |
|                                | <i>Mycetohabitans</i> sp. strain<br>HKI-403 (M7)             | RSRKRKATVQ                 | 573 – 582                           | 13                         | N/A                            | N/A                                 | N/A                        |
|                                | <i>Mycetohabitans</i> sp. strain<br>HKI-404 (M8)             | N/A                        | N/A                                 |                            | N/A                            | N/A                                 | N/A                        |

518 <sup>1</sup> Amino acid position of predicted NLS within AWR peptide sequence.

519 <sup>2</sup> Fraction of proteins predicted to be nuclear that actually are nuclear.

520 <sup>3</sup> Fraction of true nuclear proteins that are predicted (coverage).

521 <sup>4</sup> cNLS score: > 10: protein exclusively localized to the nucleus; 7 – 8: partially localized to the nucleus; 3 – 5: localized to both the nucleus and the cytoplasm; 1 – 2: localized to the cytoplasm.

522 N/A: not available.

**Table S3.** GenBank accession numbers of genes identified in this study.

| Gene          | Locus Tag   | Strain                                          | GenBank Acc. No. |
|---------------|-------------|-------------------------------------------------|------------------|
| <i>awr</i>    | RBRH 02721  | <i>Mycetohabitans rhizoxinica</i> HKI-512 (M2)  | MN840555         |
| <i>awr</i>    | RBRH 00074  | <i>Mycetohabitans rhizoxinica</i> HKI-455 (M3)  | MN840550         |
| <i>awr</i>    | RBRH 00457  | <i>Mycetohabitans rhizoxinica</i> HKI-402 (M4)  | MN840552         |
| <i>awr</i>    | RBRH 01365  | <i>Mycetohabitans endofungorum</i> HKI-456 (M5) | MN840553         |
| <i>awr</i>    | RBRH 02790  | <i>Mycetohabitans rhizoxinica</i> HKI-513 (M6)  | MN840556         |
| <i>awr</i>    | RBRH 03309  | <i>Mycetohabitans rhizoxinica</i> HKI-403 (M7)  | MN840551         |
| <i>awr</i>    | RBRH 02340  | <i>Mycetohabitans rhizoxinica</i> HKI-404 (M8)  | MN840554         |
| <i>*mtal1</i> | *RBRH 01844 | <i>Mycetohabitans</i> sp. HKI-512 (M2)          | *MN891944        |
| <i>mtal1</i>  | RBRH 01585  | <i>Mycetohabitans rhizoxinica</i> HKI-402 (M4)  | MN840538         |
| <i>*mtal1</i> | *RBRH 01844 | <i>Mycetohabitans endofungorum</i> HKI-456 (M5) | *MN891945        |
| <i>mtal1</i>  | RBRH 01580  | <i>Mycetohabitans rhizoxinica</i> HKI-513 (M6)  | MN840537         |
| <i>mtal1</i>  | RBRH 01934  | <i>Mycetohabitans rhizoxinica</i> HKI-403 (M7)  | MN840539         |
| <i>mtal1</i>  | RBRH 02907  | <i>Mycetohabitans rhizoxinica</i> HKI-403 (M7)  | MN840540         |
| <i>mtal1</i>  | RBRH 00422  | <i>Mycetohabitans rhizoxinica</i> HKI-404 (M8)  | MN840541         |
| <i>mtal2</i>  | RBRH 00895  | <i>Mycetohabitans</i> sp. HKI-512 (M2)          | MN840542         |
| <i>mtal2</i>  | RBRH 01901  | <i>Mycetohabitans rhizoxinica</i> HKI-455 (M3)  | MN840545         |
| <i>mtal2</i>  | RBRH 01694  | <i>Mycetohabitans rhizoxinica</i> HKI-513 (M6)  | MN840543         |
| <i>mtal2</i>  | RBRH 02271  | <i>Mycetohabitans rhizoxinica</i> HKI-403 (M7)  | MN840544         |
| <i>mtal3</i>  | RBRH 00894  | <i>Mycetohabitans</i> sp. HKI-512 (M2)          | MN840547         |
| <i>mtal3</i>  | RBRH 01581  | <i>Mycetohabitans rhizoxinica</i> HKI-402 (M4)  | MN840549         |
| <i>mtal3</i>  | RBRH 01695  | <i>Mycetohabitans rhizoxinica</i> HKI-513 (M6)  | MN840546         |
| <i>mtal3</i>  | RBRH 01772  | <i>Mycetohabitans rhizoxinica</i> HKI-403 (M7)  | MN840548         |

\* Sequences identified via amplification and Sanger sequencing.

527  
528  
529  
530  
531  
532  
533

**Table S4. (A)** Primers used for the amplification of *mtal1* partial coding sequences in polymerase chain reactions. **(B)** Primers used for generating a T3SS-associated *awr* mutant strain (*M. rhizoxinica*  $\Delta awr$ ) or *M. rhizoxinica mta1* mutant strains (*M. rhizoxinica*  $\Delta mta12$  or *M. rhizoxinica*  $\Delta mta13$ ). Control primers used in colony PCRs to confirm mutant strains are also listed. **(C)** Primers used for generating genetically complemented *M. rhizoxinica mta1* mutant strains (*M. rhizoxinica*  $\Delta mta12$  pBBR-*mta12* and *M. rhizoxinica*  $\Delta mta13$  pBBR-*mta13*) or *M. rhizoxinica mta1* mutant strains containing a relevant empty control vector (*M. rhizoxinica*  $\Delta mta12$  pBBR $\emptyset$  and *M. rhizoxinica*  $\Delta mta13$  pBBR $\emptyset$ ).

534  
535

| <b>A</b>                    |                     |                           |                                              |                              |
|-----------------------------|---------------------|---------------------------|----------------------------------------------|------------------------------|
| Gene                        | GenBank acc. no.    | Primer Sequence (5' - 3') |                                              | Predicted amplicon size (bp) |
| <i>mtal1</i>                | RBRH_01844          | GCTACCACCTTGCGTTTTAT      | Forward                                      | 3100 bp                      |
|                             |                     | TACTTTGCGCGTAACAGCAC      | Reverse                                      |                              |
| <b>B</b>                    |                     |                           |                                              |                              |
| Gene                        | Type                | Name                      | Oligo sequence (5' -> 3')                    |                              |
| RBRH 03012 ( <i>awr</i> )   | Vector construction | Awr ArmA Fw               | ctatagggcgaattgggtacgttgatccatgatgtagacgg    |                              |
|                             |                     | Awr ArmA Rv               | acattcatccctggctgagaatgtcaacgg               |                              |
|                             |                     | Awr ArmB Fw               | gttctctgaaaatttagtcgacaagcgcg                |                              |
|                             |                     | Awr ArmB Rv               | ctcgagggggggcccggtacaacgttgccaagcggataaaatg  |                              |
|                             |                     | Kan Awr Fw                | tctcagccagggatgaatgtcagctactgg               |                              |
|                             |                     | Kan Awr Rv                | gactaaatttcagaagaactcgtaagaag                |                              |
|                             | Control Primers     | Awr CA fw                 | aatactgctggaggccaatg                         |                              |
|                             |                     | Awr C rv                  | gcttaccacgaagatggacg                         |                              |
|                             |                     | Awr D fw                  | gttcaccaccgcttcgaaac                         |                              |
|                             |                     | Awr DB rv                 | aattgtcgaccgaaatcagc                         |                              |
|                             |                     | Kan B Fw                  | agtgacaacgtcgagcacag                         |                              |
|                             |                     | Kan A Rv                  | cgttggctaccctgatatt                          |                              |
| RBRH 01776 ( <i>mta12</i> ) | Vector construction | Tal1776 ArmA Fw (SpeI)    | gatcactagtgccggaccgatattgtaaag               |                              |
|                             |                     | Tal1776 ArmA Rv           | cggaatgaattcactactgggtcaaaccgatgccgaac       |                              |
|                             |                     | Tal1776 ArmB Fw           | gctgagaattcagtagtaggcagcggttaccagcattg       |                              |
|                             |                     | Tal1776 ArmB Rv (KpnI)    | ctagggtagcagtgctgcatagtcgtg                  |                              |
|                             |                     | Kan Tal Fw                | agtagtgaattcattccggggatcagaagaactcgtaagaaggc |                              |
|                             |                     | Kan Tal Rv                | actactgaattctcagccaatcggatgaatgtcagctactgggc |                              |
|                             | Control Primers     | 77 D Fw                   | taacgagcgcgactacagtg                         |                              |
|                             |                     | 76 C Rv                   | gttcgagtgggctgaggta                          |                              |
|                             |                     | 76 D Fw                   | caatcgagcagtagtatcgta                        |                              |
|                             |                     | 76 DB Rv                  | cacgcatatgtcatcgttc                          |                              |
|                             |                     | Kan B Fw                  | cgttggctaccctgatatt                          |                              |



|                                  |                            |                        |                                              |
|----------------------------------|----------------------------|------------------------|----------------------------------------------|
|                                  |                            | Kan A Rv               | agtgacaacgctgagcacag                         |
| <b>RBRH 01777 (<i>mtal3</i>)</b> | <b>Vector construction</b> | Tal1777 ArmA Fw(SpeI)  | gatcactagtcctgcagcgccttactattc               |
|                                  |                            | Tal1777 ArmA Rv        | cggaatgaattcactactaatcccactgacgttgggtcattc   |
|                                  |                            | Tal1777 ArmB Fw        | gctgagaattcagtagtcgaaagatggctgcacaattgtc     |
|                                  |                            | Tal1777 ArmB Rv (KpnI) | ctagggtaccaacgctcaagcaccgaatac               |
|                                  |                            | Kan Tal Fw             | agtagtgaattcattccggggatcagaagaactcgtaagaaggc |
|                                  |                            | Kan Tal Rv             | actactgaattctcagccaatcggatgaatgtcagctactgggc |
|                                  | <b>Control Primers</b>     | 77 CA Fw               | cgtgatgtcgggtcaacac                          |
|                                  |                            | 77 C Rv                | gccattgttatcggcaatct                         |
|                                  |                            | 77 D Fw                | taacgagcgcgactacagtg                         |
|                                  |                            | 77 DB Rv               | ctggttaagctgagcccaaac                        |
|                                  |                            | Kan B Fw               | cgtggctaccctgatatt                           |
|                                  |                            | Kan A Rv               | agtgacaacgctgagcacag                         |

536

537

**C**

| Gene                             | Type                       | Name            | Oligo binding sequence with <u>overhang</u> (5' → 3')    |
|----------------------------------|----------------------------|-----------------|----------------------------------------------------------|
| <b>RBRH 01776 (<i>mtal2</i>)</b> | <b>Vector construction</b> | <i>mtal2</i> fw | <u>GCTTCGAAAGGACAAGCATATGCCGGCGACGTCTATGCATC</u>         |
|                                  |                            | <i>mtal2</i> rv | <u>TGGTCCTCGCGCCAGCTTAAGCTATTGCCGCTCCAGCAAGAGTG</u>      |
| <b>RBRH 01777 (<i>mtal3</i>)</b> | <b>Vector construction</b> | <i>mtal3</i> fw | <u>GCTTCGAAAGGACAAGCATATGCCGGTGACGTCTGTGTATC</u>         |
|                                  |                            | <i>mtal3</i> rv | <u>TGGTCCTCGCGCCAGCTTAAGCTATTGCCGCCCGACAATTG</u>         |
| <b><i>gfp</i></b>                | <b>Vector construction</b> | <i>gfp</i> fw   | <u>GCGGCAATAGCTGACAATCGGATCGAGCTTCG</u>                  |
|                                  |                            | <i>gfp</i> rv   | <u>TGGTCCTCGCGCCAGCTTAAGTTATTTGTATAGTTTCATCCATGCCATG</u> |

---

|               |                        |                   |                     |
|---------------|------------------------|-------------------|---------------------|
| <b>Insert</b> | <b>Control Primers</b> | <i>cmf</i> seq fw | GGGTATGTGGTCGAAGGC  |
|               |                        | BBR seq rv        | GCAAGGCGACAAGGTGCTG |

---

|                   |                       |               |                         |
|-------------------|-----------------------|---------------|-------------------------|
| <b>Colony PCR</b> | <b>Control Primer</b> | pBBR_verif_fw | ATTAATTATCCACAGAATCAGGG |
|                   |                       | pBBR_verif_rv | CGGCTACATCATTCACTTTTTTC |

---

538

539

540  
541**Table S5.** Predicted nuclear localisation signal (NLS) within TAL effector proteins from endofungal *Mycetohabitans* species (MTALs) using the NucPred prediction software (3).

| Species                                            | MTAL<br>protein | NucPred Predictions <sup>1</sup> |                          |                          | NLS  |
|----------------------------------------------------|-----------------|----------------------------------|--------------------------|--------------------------|------|
|                                                    |                 | Score                            | Specificity <sup>2</sup> | Sensitivity <sup>3</sup> |      |
| <i>Mycetohabitans rhizoxinica</i><br>HKI-454 (M1)  | MTAL1           | 0.23                             | 0.52                     | 0.83                     | RIRK |
|                                                    | MTAL2           | 0.27                             | 0.52                     | 0.83                     | RIRK |
|                                                    | MTAL3           | 0.08                             | N/A                      | N/A                      | QIRK |
| <i>Mycetohabitans</i> sp. strain<br>HKI-512 (M2)   | MTAL1           | 0.22                             | 0.52                     | 0.83                     | RIRK |
|                                                    | MTAL2           | 0.27                             | 0.52                     | 0.83                     | RIRK |
|                                                    | MTAL3           | 0.08                             | N/A                      | N/A                      | QIRK |
| <i>Mycetohabitans</i> sp. strain<br>HKI-455 (M3)   | MTAL2           | 0.14                             | 0.45                     | 0.88                     | RIRK |
| <i>Mycetohabitans</i> sp. strain<br>HKI-402 (M4)   | MTAL1           | 0.23                             | 0.52                     | 0.83                     | RIRK |
|                                                    | MTAL3           | 0.09                             | N/A                      | N/A                      | QIRK |
| <i>Mycetohabitans endofungorum</i><br>HKI-456 (M5) | MTAL1           | 0.22                             | 0.52                     | 0.83                     | RIRK |
| <i>Mycetohabitans</i> sp. strain<br>HKI-513 (M6)   | MTAL1           | 0.23                             | 0.52                     | 0.83                     | RIRK |
|                                                    | MTAL2           | 0.27                             | 0.52                     | 0.83                     | RIRK |
|                                                    | MTAL3           | 0.08                             | N/A                      | N/A                      | QIRK |
| <i>Mycetohabitans</i> sp. strain<br>HKI-403 (M7)   | MTAL1           | 0.17                             | 0.45                     | 0.88                     | RIRK |
|                                                    | MTAL2           | 0.16                             | 0.45                     | 0.88                     | RIRK |
|                                                    | MTAL3           | 0.05                             | N/A                      | N/A                      | QIRK |
| <i>Mycetohabitans</i> sp. strain<br>HKI-404 (M8)   | MTAL1           | 0.12                             | 0.45                     | 0.88                     | RIRK |

542 <sup>1</sup> Nuclear localisation predicted with NucPred (3).543 <sup>2</sup> Fraction of proteins predicted to be nuclear that actually are nuclear.544 <sup>3</sup> Fraction of true nuclear proteins that are predicted (coverage).

545 N/A: not available.

546

547

548 **Table S6.** (A) Approximate probabilities ( $p$ ) of Brown-Forsythe test, (B) one-way analysis of variance (ANOVA), and (C)  
549 Tukey HSD Post Hoc Test for fungal spore counts following co-cultivation of apo-symbiotic *R. microsporus* (RMapo) with  
550 *M. rhizoxinica* wild type (M1WT), *M. rhizoxinica mta1* mutant strains (*M. rhizoxinica Δmta1*, *M. rhizoxinica Δmta2*, and *M.*  
551 *rhizoxinica Δmta3*), or a T3SS-associated *awr* mutant strain (*M. rhizoxinica Δawr*). Homogeneous data (non-significant  
552 Brown-Forsythe) is shown in black numbers. P-values with  $p < 0.05$  were considered statistically significant (marked in grey).

553

**A**

| <b>Brown-Forsythe Test</b>                  |               |
|---------------------------------------------|---------------|
| F (DFn, DFd)                                | 1.135 (5, 18) |
| P value                                     | 0.378         |
| P value summary                             | ns            |
| Are SDs significantly different (P < 0.05)? | No            |

554

**B**

| <b>ANOVA Summary</b>                    |           |           |           |                     |                |
|-----------------------------------------|-----------|-----------|-----------|---------------------|----------------|
| F                                       | 202.4     |           |           |                     |                |
| P value                                 | <0.0001   |           |           |                     |                |
| P value summary                         | ****      |           |           |                     |                |
| Significant diff. among means (P<0.05)? | Yes       |           |           |                     |                |
| R squared                               | 0.9825    |           |           |                     |                |
| <b>ANOVA Table</b>                      | <b>SS</b> | <b>DF</b> | <b>MS</b> | <b>F (DFn, DFd)</b> | <b>P value</b> |
| Treatment (between columns)             | 1E+18     | 5         | 2E+17     | F (5, 18) = 202.4   | P<0.0001       |
| Residual (within columns)               | 1.78E+16  | 18        | 9.89E+14  |                     |                |
| Total                                   | 1.02E+18  | 23        |           |                     |                |

555

**C**

| <b>Strain Comparison</b> |              | <b>Mean Diff.</b> | <b>95% CI</b> |    |           | <b>Summary</b> | <b>P value</b> |
|--------------------------|--------------|-------------------|---------------|----|-----------|----------------|----------------|
| RMapo                    | M1WT         | -4.96E+08         | -5.67E+08     | to | -4.26E+08 | ****           | <0.0001        |
|                          | <i>Δawr</i>  | -4.49E+08         | -5.20E+08     | to | -3.78E+08 | ****           | <0.0001        |
|                          | <i>Δmta1</i> | -3.26E+07         | -1.03E+08     | to | 3.81E+07  | ns             | 0.6895         |
|                          | <i>Δmta2</i> | -8.66E+07         | -1.57E+08     | to | -1.59E+07 | *              | 0.0116         |
|                          | <i>Δmta3</i> | -5.66E+07         | -1.27E+08     | to | 1.41E+07  | ns             | 0.1631         |
| M1WT                     | <i>Δawr</i>  | 4.74E+07          | -2.33E+07     | to | 1.18E+08  | ns             | 0.3159         |
|                          | <i>Δmta1</i> | 4.64E+08          | 3.93E+08      | to | 5.34E+08  | ****           | <0.0001        |
|                          | <i>Δmta2</i> | 4.10E+08          | 3.39E+08      | to | 4.80E+08  | ****           | <0.0001        |
|                          | <i>Δmta3</i> | 4.40E+08          | 3.69E+08      | to | 5.10E+08  | ****           | <0.0001        |
| <i>Δawr</i>              | <i>Δmta1</i> | 4.16E+08          | 3.46E+08      | to | 4.87E+08  | ****           | <0.0001        |
|                          | <i>Δmta2</i> | 3.62E+08          | 2.92E+08      | to | 4.33E+08  | ****           | <0.0001        |
|                          | <i>Δmta3</i> | 3.92E+08          | 3.22E+08      | to | 4.63E+08  | ****           | <0.0001        |
| <i>Δmta1</i>             | <i>Δmta2</i> | -5.40E+07         | -1.25E+08     | to | 1.67E+07  | ns             | 0.1982         |
|                          | <i>Δmta3</i> | -2.40E+07         | -9.47E+07     | to | 4.67E+07  | ns             | 0.8833         |
| <i>Δmta2</i>             | <i>Δmta3</i> | 3.00E+07          | -4.07E+07     | to | 1.01E+08  | ns             | 0.7549         |

556

Abbreviations: SS: sum of squares, DF: degrees of freedom, MS: mean square, Mean Diff.: mean difference.

557

558  
559  
560  
561  
562  
563  
564  
565  
566

**Table S7.** (A) Approximate probabilities ( $p$ ) of Brown-Forsythe test, (B) one-way analysis of variance (ANOVA), and (C) Tukey HSD Post Hoc Test for fungal spore counts following co-cultivation of apo-symbiotic *R. microsporus* with *M. rhizoxinica* wild type (M1WT), *M. rhizoxinica mta1* mutant strains (*M. rhizoxinica Δmta1*, *M. rhizoxinica Δmta2*, and *M. rhizoxinica Δmta3*), *M. rhizoxinica mta1* mutant strains containing the relevant empty vector (*M. rhizoxinica Δmta1* pBBRØ, *M. rhizoxinica Δmta2* pBBRØ, and *M. rhizoxinica Δmta3* pBBRØ), or *M. rhizoxinica mta1* mutant strains expressing a plasmid-borne copy of the relevant *mta1* gene (*M. rhizoxinica Δmta1* pBBR-*mta1*, *M. rhizoxinica Δmta2* pBBR-*mta2*, and *M. rhizoxinica Δmta3* pBBR-*mta3*). Homogeneous data (non-significant Brown-Forsythe) is shown in black numbers. P-values with  $p < 0.05$  were considered statistically significant (marked in grey).

567

**A**

| Brown-Forsythe Test                         |               |
|---------------------------------------------|---------------|
| F (DFn, DFd)                                | 1.425 (9, 30) |
| P value                                     | 0.2217        |
| P value summary                             | ns            |
| Are SDs significantly different (P < 0.05)? | No            |

**B**

| ANOVA Summary                           |         |
|-----------------------------------------|---------|
| F                                       | 75.57   |
| P value                                 | <0.0001 |
| P value summary                         | ****    |
| Significant diff. among means (P<0.05)? | Yes     |
| R squared                               | 0.9578  |

| ANOVA Table                 | SS        | DF | MS        | F (DFn, DFd)      | P value  |
|-----------------------------|-----------|----|-----------|-------------------|----------|
| Treatment (between columns) | 1.193E+18 | 9  | 1.325E+17 | F (9, 30) = 75.57 | P<0.0001 |
| Residual (within columns)   | 5.262E+16 | 30 | 1.754E+15 |                   |          |
| Total                       | 1.246E+18 | 39 |           |                   |          |

568

**C**

| Strain Comparison  |                                | Mean Diff. | 95% CI      |              | Summary | P value |
|--------------------|--------------------------------|------------|-------------|--------------|---------|---------|
| M1WT               | <i>Δmta1</i>                   | 4.64E+08   | 3.63E+08    | to 5.65E+08  | ****    | <0.0001 |
|                    | <i>Δmta2</i>                   | 4.10E+08   | 3.09E+08    | to 5.11E+08  | ****    | <0.0001 |
|                    | <i>Δmta3</i>                   | 4.40E+08   | 3.39E+08    | to 5.41E+08  | ****    | <0.0001 |
|                    | <i>Δmta1</i> pBBR- <i>mta1</i> | 1.21E+08   | 2.02E+07    | to 2.22E+08  | **      | 0.0094  |
|                    | <i>Δmta2</i> pBBR- <i>mta2</i> | 1.46E+08   | 4.52E+07    | to 2.47E+08  | ***     | 0.001   |
|                    | <i>Δmta3</i> pBBR- <i>mta3</i> | 1.21E+08   | 2.02E+07    | to 2.22E+08  | **      | 0.0094  |
|                    | <i>Δmta1</i> pBBRØ             | 3.94E+08   | 2.93E+08    | to 4.95E+08  | ****    | <0.0001 |
|                    | <i>Δmta2</i> pBBRØ             | 4.74E+08   | 3.73E+08    | to 5.75E+08  | ****    | <0.0001 |
|                    | <i>Δmta3</i> pBBRØ             | 4.53E+08   | 3.52E+08    | to 5.54E+08  | ****    | <0.0001 |
| <i>Δmta1</i>       | <i>Δmta2</i>                   | -5.40E+07  | -1.55E+08   | to 4.70E+07  | ns      | 0.7161  |
|                    | <i>Δmta3</i>                   | -2.40E+07  | -1.25E+08   | to 7.70E+07  | ns      | 0.9978  |
|                    | <i>Δmta1</i> pBBR- <i>mta1</i> | -3.42E+08  | -4.43E+08   | to -2.41E+08 | ****    | <0.0001 |
|                    | <i>Δmta2</i> pBBR- <i>mta2</i> | -3.17E+08  | -4.18E+08   | to -2.16E+08 | ****    | <0.0001 |
|                    | <i>Δmta3</i> pBBR- <i>mta3</i> | -3.42E+08  | -4.43E+08   | to -2.41E+08 | ****    | <0.0001 |
|                    | <i>Δmta1</i> pBBRØ             | -6.96E+07  | -1.71E+08   | to 3.15E+07  | ns      | 0.3892  |
|                    | <i>Δmta2</i> pBBRØ             | 9.99E+06   | -9.10E+07   | to 1.11E+08  | ns      | >0.9999 |
| <i>Δmta3</i> pBBRØ | -1.08E+07                      | -1.12E+08  | to 9.02E+07 | ns           | >0.9999 |         |

|                                |                                |                            |           |           |           |           |         |
|--------------------------------|--------------------------------|----------------------------|-----------|-----------|-----------|-----------|---------|
|                                | $\Delta mta3$                  | 3.00E+07                   | -7.10E+07 | to        | 1.31E+08  | ns        | 0.9891  |
| $\Delta mta2$                  | $\Delta mta1$ pBBR- $mta1$     | -2.88E+08                  | -3.89E+08 | to        | -1.87E+08 | ****      | <0.0001 |
|                                | $\Delta mta2$ pBBR- $mta2$     | -2.63E+08                  | -3.64E+08 | to        | -1.62E+08 | ****      | <0.0001 |
|                                | $\Delta mta3$ pBBR- $mta3$     | -2.88E+08                  | -3.89E+08 | to        | -1.87E+08 | ****      | <0.0001 |
|                                | $\Delta mta1$ pBBR $\emptyset$ | -1.56E+07                  | -1.17E+08 | to        | 8.55E+07  | ns        | >0.9999 |
|                                | $\Delta mta2$ pBBR $\emptyset$ | 6.40E+07                   | -3.70E+07 | to        | 1.65E+08  | ns        | 0.5027  |
|                                | $\Delta mta3$ pBBR $\emptyset$ | 4.32E+07                   | -5.78E+07 | to        | 1.44E+08  | ns        | 0.8973  |
|                                | $\Delta mta3$                  | $\Delta mta1$ pBBR- $mta1$ | -3.18E+08 | -4.19E+08 | to        | -2.17E+08 | ****    |
| $\Delta mta2$ pBBR- $mta2$     |                                | -2.93E+08                  | -3.94E+08 | to        | -1.92E+08 | ****      | <0.0001 |
| $\Delta mta3$ pBBR- $mta3$     |                                | -3.18E+08                  | -4.19E+08 | to        | -2.17E+08 | ****      | <0.0001 |
| $\Delta mta1$ pBBR $\emptyset$ |                                | -4.56E+07                  | -1.47E+08 | to        | 5.55E+07  | ns        | 0.8657  |
| $\Delta mta2$ pBBR $\emptyset$ |                                | 3.40E+07                   | -6.70E+07 | to        | 1.35E+08  | ns        | 0.9749  |
| $\Delta mta3$ pBBR $\emptyset$ |                                | 1.32E+07                   | -8.78E+07 | to        | 1.14E+08  | ns        | >0.9999 |
| $\Delta mta1$<br>pBBR- $mta1$  | $\Delta mta2$ pBBR- $mta2$     | 2.50E+07                   | -7.60E+07 | to        | 1.26E+08  | ns        | 0.9971  |
|                                | $\Delta mta3$ pBBR- $mta3$     | 0.00E+00                   | -1.01E+08 | to        | 1.01E+08  | ns        | >0.9999 |
|                                | $\Delta mta1$ pBBR $\emptyset$ | 2.73E+08                   | 1.72E+08  | to        | 3.74E+08  | ****      | <0.0001 |
|                                | $\Delta mta2$ pBBR $\emptyset$ | 3.52E+08                   | 2.51E+08  | to        | 4.53E+08  | ****      | <0.0001 |
|                                | $\Delta mta3$ pBBR $\emptyset$ | 3.32E+08                   | 2.31E+08  | to        | 4.33E+08  | ****      | <0.0001 |
| $\Delta mta2$<br>pBBR- $mta2$  | $\Delta mta3$ pBBR- $mta3$     | -2.50E+07                  | -1.26E+08 | to        | 7.60E+07  | ns        | 0.9971  |
|                                | $\Delta mta1$ pBBR $\emptyset$ | 2.48E+08                   | 1.47E+08  | to        | 3.49E+08  | ****      | <0.0001 |
|                                | $\Delta mta2$ pBBR $\emptyset$ | 3.27E+08                   | 2.26E+08  | to        | 4.28E+08  | ****      | <0.0001 |
|                                | $\Delta mta3$ pBBR $\emptyset$ | 3.07E+08                   | 2.06E+08  | to        | 4.08E+08  | ****      | <0.0001 |
| $\Delta mta3$<br>pBBR- $mta3$  | $\Delta mta1$ pBBR $\emptyset$ | 2.73E+08                   | 1.72E+08  | to        | 3.74E+08  | ****      | <0.0001 |
|                                | $\Delta mta2$ pBBR $\emptyset$ | 3.52E+08                   | 2.51E+08  | to        | 4.53E+08  | ****      | <0.0001 |
|                                | $\Delta mta3$ pBBR $\emptyset$ | 3.32E+08                   | 2.31E+08  | to        | 4.33E+08  | ****      | <0.0001 |
| $\Delta mta1$ pBBR $\emptyset$ | $\Delta mta2$ pBBR $\emptyset$ | 7.96E+07                   | -2.15E+07 | to        | 1.81E+08  | ns        | 0.2242  |
|                                | $\Delta mta3$ pBBR $\emptyset$ | 5.88E+07                   | -4.22E+07 | to        | 1.60E+08  | ns        | 0.615   |
| $\Delta mta2$ pBBR $\emptyset$ | $\Delta mta3$ pBBR $\emptyset$ | -2.08E+07                  | -1.22E+08 | to        | 8.03E+07  | ns        | 0.9993  |

Abbreviations: SS: sum of squares, DF: degrees of freedom, MS: mean square, Mean Diff.: mean difference.

571

572

**References**

573

574

575

576

577

578

579

580

581

582

1. Lange, O. et al. Programmable DNA-binding proteins from *Burkholderia* provide a fresh perspective on the TALE-like repeat domain. *Nucleic Acids Res.* **42**, 7436-7449 (2014).
2. Lackner, G. et al. Global distribution and evolution of a toxinogenic *Burkholderia-Rhizopus* symbiosis. *Appl. Environ. Microbiol.* **75**, 2982-2986 (2009).
3. Brameier, M., Krings, A. & MacCallum, R. M. NucPred-predicting nuclear localization of proteins. *Bioinformatics (Oxford, England)* **23**, 1159-1160 (2007).
4. Kosugi, S., Hasebe, M., Tomita, M. & Yanagawa, H. Systematic identification of cell cycle-dependent yeast nucleocytoplasmic shuttling proteins by prediction of composite motifs. *Proc. Natl. Acad. Sci. U.S.A.* **106**, 10171-10176 (2009).

583
